# Supplementary material for: Evaluating the Tea Bag Index approach for different management practices in agroecosystems using long-term field experiments in Austria and Sweden
Source: Copernicus journal article supplement (doi:10.5194/egusphere-2023-1229), 2023-06-26

## Supplementary material

Table S1 - Soil type and properties at different sites in Austria and Sweden.

| Site           | Experiment | Soil texture    | Clay | SOC  | C:N  | pH  |
|----------------|------------|-----------------|------|------|------|-----|
|                |            |                 | (%)  |      |      |     |
| <i>Austria</i> |            |                 |      |      |      |     |
| AT1            | CB         | Loam            | 33   | 2.17 | 10.6 | 7.6 |
| AT2            | CB         | Loam            | 33   | 2.17 | 10.6 | 7.6 |
| AT3            | CB         | Loamy silt      | 17   | 1.45 | 9.0  | 7.1 |
| AT4            | CB         | Loamy silt      | 16   | 0.88 | 8.4  | 5.5 |
| AT5            | CB         | Sand loam       | 23   | 2.1  | 10.3 | 7.6 |
| AT6            | CB         | Sand loam       | 23   | 2.1  | 10.4 | 7.5 |
| AT7            | SF         | Loam            | 34   | 2.82 | 11.5 | 7.6 |
| AT8            | SF         | Loam            | 34   | 2.81 | 11.4 | 7.6 |
| AT9            | SF         | Loam            | 29   | 3.26 | 10.4 | 7.7 |
| AT10           | SF         | Loam            | 18   | 2.8  | 11.3 | 7.7 |
| AT11           | SF         | Silty clay      | 30   | 2.8  | 10   | 6.8 |
| AT12           | SF         | Loamy           | 29   | 3.26 | 10.4 | 7.7 |
| AT13           | SF         | Loamy           | 27   | 0.98 | 8.2  | 6.3 |
| AT14           | SF         | Loamy silt      | 18   | 1.54 | 9.5  | 7.5 |
| AT15           | TS         | Sand loam       | 22   | 1.9  | 10.6 | 7.5 |
| AT16           | TS         | Sand loam       | 22   | 1.94 | 10.3 | 7.5 |
| <i>Sweden</i>  |            |                 |      |      |      |     |
| SE1            | CMP        | Sandy clay loam | 15   | 1.28 | 12.8 | 7.7 |
| SE2            | CMP        | Loam            | 15   | 2.40 | 13.5 | 7.0 |
| SE3            | CMP        | Silty sand      | 10   | 2.05 | 13.9 | 6.3 |
| SE4            | CMP        | Silty clay      | 5.6  | 2.19 | 10.4 | 6.4 |
| SE5            | CMP        | Silty loam      | 10   | 2.54 | 13.2 | 6.1 |
| SE6            | CMP        | Silty clay      | 50   | 2.21 | 10.9 | 6.9 |
| SE7            | ROT        | Silty clay loam | 36   | 2.07 | 11.6 | 6.1 |
| SE8            | ROT        | Sandy clay loam | 25   | 1.99 | 10.5 | 6.0 |
| SE9            | ROT        | Silt loam       | <5   | 1.99 | 14.2 | 5.4 |
| SE10           | ROT        | Silty clay loam | 36   | 2.55 | 10.9 | 5.6 |
| SE11           | TS         | Heavy clay      | 47   | 1.16 | 10.7 | 6.9 |
| SE12           | TS         | Silty loam      | 18   | 2.78 | 10.7 | 6.1 |
| SE13           | TS         | Silty clay loam | 38   | 1.16 | 10.7 | 6.1 |

Table S2 - Statistical analysis comparing effects of A) treatment within sites in Austria; and B) sites for specific treatments on *k* and *S*.

| Site            | A) Treatment | <i>k</i>            | <i>S</i>           | B) Site            | <i>k</i>            | <i>S</i> |
|-----------------|--------------|---------------------|--------------------|--------------------|---------------------|----------|
| Carbon balance  |              |                     |                    |                    |                     |          |
| AT1             | GM           | .0087 <sup>ns</sup> | .132 <sup>ns</sup> |                    |                     |          |
|                 | FW           | .0079               | .110               |                    |                     |          |
|                 | BS           | .0078               | .147               |                    |                     |          |
|                 | FYM          | .0069               | .151               |                    |                     |          |
| AT2             | GM           | .0055 <sup>ns</sup> | .423 ab            |                    |                     |          |
|                 | FW           | .0061               | .439 a             |                    |                     |          |
|                 | BS           | .0045               | .344 b             |                    |                     |          |
|                 | FYM          | .0048               | .380 ab            |                    |                     |          |
| AT3             | 0 N          | .0177 <sup>ns</sup> | .213 <sup>ns</sup> |                    |                     |          |
|                 | 40 N         | .0147               | .182               |                    |                     |          |
|                 | 90 N         | .0125               | .186               |                    |                     |          |
|                 | 120 N        | .0147               | .165               |                    |                     |          |
|                 | CFW          | .0143               | .176               |                    |                     |          |
|                 | CGM          | .0165               | .185               |                    |                     |          |
|                 | CS           | .0121               | .173               |                    |                     |          |
|                 | CSS          | .0150               | .188               |                    |                     |          |
|                 | CFW+80       | .0167               | .207               |                    |                     |          |
|                 | CGM+80       | .0139               | .176               |                    |                     |          |
|                 | CS+80        | .0177               | .177               |                    |                     |          |
|                 | CSS+80       | .0128               | .171               |                    |                     |          |
|                 | AT4 & AT6    | CRR                 | .0061 b            | .185 <sup>ns</sup> | AT4                 | .0058 b  |
| CRI             |              | .0087 a             | .172               | AT6                | .0089 a             | .144 b   |
| AT5             | CRR          | .0083 <sup>ns</sup> | .312 <sup>ns</sup> |                    |                     |          |
|                 | CRI          | .0083               | .319               |                    |                     |          |
| AT5 & AT6       | CRR          | .0080 b             | .231 <sup>ns</sup> | AT5                | .0083 <sup>ns</sup> | .315 a   |
|                 | CRI          | .0093 a             | .228               | AT6                | .0089               | .144 b   |
| Soil fertility  |              |                     |                    |                    |                     |          |
| AT7 & AT9       | 60 N         | .0140 <sup>ns</sup> | .379 <sup>ns</sup> | AT7                | .0128 <sup>ns</sup> | .338 b   |
|                 | 90 N         | .0120               | .392               | AT9                | .0118               | .417 a   |
|                 | 120 N        | .0115 <sup>ns</sup> | .363 <sup>ns</sup> |                    |                     |          |
|                 | 145 N        | .0127               | .392               |                    |                     |          |
| AT8             | 60 N         | .0164               | .305               |                    |                     |          |
|                 | 90 N         | .0153               | .335               |                    |                     |          |
|                 | 120 N        | .0130               | .335               |                    |                     |          |
|                 | 145 N        | .0135               | .326               |                    |                     |          |
| AT10 & AT11     | 0 P          | .0087 <sup>ns</sup> | .124 <sup>ns</sup> | AT10               | .0082 b             | .113 b   |
|                 | 150 P        | .0093               | .140               | AT11               | .0105 a             | .156 a   |
|                 | 300 P        | .0095               | .129               |                    |                     |          |
| AT12 AT13 AT14  | 0 N          | .0066 b             | .174 <sup>ns</sup> | AT12               | .0093 a             | .148 b   |
|                 | 60 N         | .0090 ab            | .150               | AT13               | .0072 b             | .195 a   |
|                 | 120 N        | .0084 ab            | .162               | AT14               | .0086 ab            | .141 b   |
|                 | 180 N        | .0095 a             | .160               |                    |                     |          |
| Tillage systems |              |                     |                    |                    |                     |          |
| AT15            | CT           | .0092 b             | .198 a             |                    |                     |          |
|                 | SRT          | .0147 a             | .154 b             |                    |                     |          |
|                 | DRT          | .0105 b             | .197 a             |                    |                     |          |
| AT16            | CT           | .0087 <sup>ns</sup> | .439 <sup>ns</sup> |                    |                     |          |
|                 | SRT          | .0100               | .465               |                    |                     |          |
|                 | DRT          | .0118               | .421               |                    |                     |          |
| AT15 & AT16     |              |                     |                    | AT15               | .0115 <sup>ns</sup> | .183 b   |
|                 |              |                     |                    | AT16               | .0102               | .442 a   |

Mean values followed by the same letter within treatments and within sites did not differ according to Tukey's test ( $p < 0.05$ ). ns: not significant.

Table S3 - Statistical analysis comparing A) different treatments within sites in Sweden; B) different sites presenting the same treatments in Sweden; and C) different treatments and sites for Tillage System (TS) experiment category in Austria and Sweden.

| A) Treatment                                        | <i>k</i> | <i>S</i>           | B) Site          | <i>k</i>            | <i>S</i> |
|-----------------------------------------------------|----------|--------------------|------------------|---------------------|----------|
| Combined management practices                       |          |                    |                  |                     |          |
| FYM/NPK                                             | .0195 a  | .253 a             | SE1              | .0150 ab            | .125 d   |
| 0FYM/0NPK                                           | .0130 b  | .206 b             | SE2              | .0167 ab            | .129 d   |
|                                                     |          |                    | SE3              | .0147 ab            | .361 a   |
|                                                     |          |                    | SE4              | .0084 b             | .118 c   |
|                                                     |          |                    | SE5              | .0301 a             | .270 b   |
|                                                     |          |                    | SE6              | .0210 a             | .335 ab  |
|                                                     |          |                    | Rotation systems |                     |          |
| SC                                                  | .0166 a  | .263 <sup>ns</sup> | SE7              | .0144 b             | .323 a   |
| L                                                   | .0137 b  | .267               | SE8              | .0133 b             | .337 a   |
|                                                     |          |                    | SE9              | .0202 a             | .199 b   |
|                                                     |          |                    | SE10             | .0130 b             | .200 b   |
| Tillage systems                                     |          |                    |                  |                     |          |
| CT                                                  | .0122 b  | .251 b             | SE11             | .0145 <sup>ns</sup> | .267 ab  |
| SRT                                                 | .0130 ab | .275 ab            | SE12             | .0131               | .294 a   |
| DRT                                                 | .0153 a  | .299 a             | SE13             | .0130               | .247 b   |
| DS                                                  | .0126 ab | .279 ab            |                  |                     |          |
| C) Tillage systems experiment in Austria and Sweden |          |                    |                  |                     |          |
| Treatment                                           | <i>k</i> | <i>S</i>           | Site             | <i>k</i>            | <i>S</i> |
| Tillage systems                                     |          |                    |                  |                     |          |
| CT                                                  | .0113 b  | .298 b             | SE11             | .0175 a             | .279 b   |
| SRT                                                 | .0115 ab | .370 a             | SE12             | .0130 a             | .294 b   |
| DRT                                                 | .0143 a  | .336 ab            | SE13             | .0130 a             | .247 b   |
|                                                     |          |                    | AT16             | .0102 b             | .442 a   |

Mean values followed by the same letter within treatments and within sites did not differ according to Tukey's test ( $p < 0.05$ ). ns: not significant.

Table S4 – Correlation coefficients between the mean TBI parameters ( $k$  and  $S$ ) calculated after 60\* and 90 days and pedo-climatic parameters, in Austria and Sweden.

| Parameter          | Austria  |           | Sweden  |          | Austria and Sweden |          |            |            |
|--------------------|----------|-----------|---------|----------|--------------------|----------|------------|------------|
|                    | $k$      | $S$       | $k$     | $S$      | $k$                | $S$      | $k_{60}^*$ | $S_{60}^*$ |
| MAT                | 0.410    | -0.038    | -0.586* | 0.016    | -0.751***          | -0.290   | -0.796***  | 0.374      |
| MAT <sub>TBI</sub> | -0.417   | -0.339    | -0.073  | -0.784** | -0.634***          | -0.497*  | -0.447     | 0.223      |
| TAP                | -0.580*  | -0.020    | 0.392   | -0.233   | -0.533**           | -0.328   | 0.083      | -0.140     |
| TP <sub>TBI</sub>  | -0.479   | -0.026    | 0.310   | -0.216   | -0.394             | -0.251   | 0.549*     | -0.450     |
| PET                | -0.289   | 0.155     | -0.263  | 0.305    | -0.656***          | -0.174   | -0.630*    | 0.650      |
| PET <sub>TBI</sub> | -0.233   | 0.133     | -0.152  | 0.208    | -0.480*            | -0.094   | -0.254     | -0.138     |
| AI                 | 0.428    | 0.108     | -0.465  | 0.374    | -0.232             | 0.229    | -0.564*    | 0.428      |
| AI <sub>TBI</sub>  | 0.334    | -0.044    | -0.323  | 0.307    | 0.023              | 0.198    | -0.432     | 0.330      |
| T x P              | -0.617*  | -0.059    | -0.122  | 0.003    | -0.686***          | -0.307   | -0.583*    | 0.257      |
| $Re_{clim}$        | -0.707** | -0.756**  | -0.067  | -0.373   | -0.603**           | -0.538** | -0.247     | 0.153      |
| $Re_{temp}$        | -0.597*  | -0.829*** | -0.167  | -0.746** | -0.617**           | -0.628** | -0.237     | 0.159      |
| $Re_{wat}$         | -0.519   | -0.013    | 0.167   | -0.034   | 0.077              | 0.087    | -0.007     | 0.148      |
| pH                 | 0.480    | 0.059     | -0.077  | -0.216   | -0.288             | -0.237   | -0.517*    | 0.144      |
| Clay               | 0.151    | 0.098     | -0.165  | 0.237    | -0.153             | 0.150    | -0.534*    | 0.272      |
| SOC                | 0.409    | 0.049     | 0.222   | 0.103    | 0.243              | 0.015    | 0.070      | 0.196      |
| C:N ratio          | 0.044    | 0.300     | 0.541*  | -0.287   | 0.642***           | 0.063    | 0.697**    | -0.508*    |

\* $k_{60}$  and  $S_{60}$  are the values for TBI collected after approximately 60 days, at the 13 sites in Sweden, and 5 sites in Austria.

MAT: mean annual temperature; MAT<sub>TBI</sub>: mean temperature during TBI period; TAP: total annual precipitation; TP<sub>TBI</sub>: total precipitation during TBI period; PET: potential evapotranspiration; PET<sub>TBI</sub>: potential evapotranspiration during TBI period; AI: aridity index; AI<sub>TBI</sub>: aridity index during TBI period; TxP: temperature times precipitation factor;  $Re_{clim}$ : climatic factor model;  $Re_{temp}$ : temperature factor model;  $Re_{wat}$ : soil moisture factor model.

Figure S1– Model adjusted to the green and rooibos tea mass loss fraction at 13 sites in Sweden and one site in Austria. Errors bars represent SD of the data.

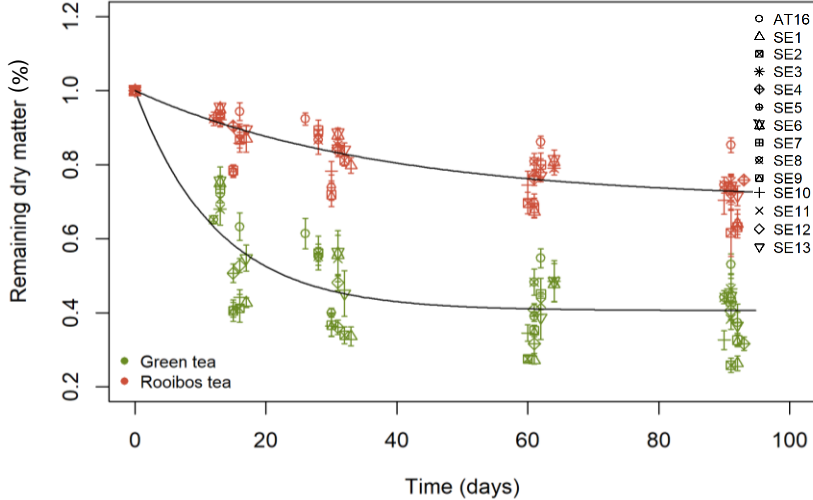

Supplement: Supplementary file 1 [file egusphere-2023-1229-supplement.pdf]
