# Supplementary material for: Evaluating the Tea Bag Index approach for different management practices in agroecosystems using long-term field experiments in Austria and Sweden
Source: Copernicus journal article supplement (doi:10.5194/egusphere-2023-1229), 2023-06-26
Supplement: Supplementary file [file egusphere-2023-1229-EC1-supplement.pdf]

1 **Evaluating the Tea Bag Index approach for different management practices in**  
2 **agroecosystems using long-term field experiments in Austria and Sweden**

3

4 Maria Regina Gmach<sup>1\*</sup>, Martin A. Bolinder<sup>1</sup>, Lorenzo Menichetti<sup>1</sup>, Thomas Kätterer<sup>1</sup>, Heide  
5 Spiegel<sup>2</sup>, Olle Åkesson<sup>1,3</sup>, Jürgen Kurt Friedel<sup>4</sup>, Andreas Surböck<sup>4</sup>, Agnes Schweinzer<sup>5</sup>, Taru  
6 Sandén<sup>2</sup>

7

8 <sup>1</sup>Swedish University of Agricultural Science (SLU), Department of Ecology, Box 7044, 75007,  
9 Uppsala, Sweden

10 <sup>2</sup>Austrian Agency for Health & Food Safety (AGES), Department for Soil Health and Plant  
11 Nutrition, Spargelfeldstraße 191, A-1220 Vienna, Austria

12 <sup>3</sup>Lantmännen Lantbruk, Mariestadsvägen 104, 541 39 Skövde, Sweden

13 <sup>4</sup>University of Natural Resources and Life Sciences (BOKU), Department of Sustainable  
14 Agricultural Systems, Institute of Organic Farming (IFÖL), Gregor-Mendel-Straße 33, A-1180  
15 Vienna, Austria

16 <sup>5</sup>Easy-Cert services GmbH, Königsbrunner Straße 8, Austria

17

18 **Corresponding author**

19 \* Maria Regina Gmach

20 Swedish University of Agricultural Science (SLU)

21 Uppsala, Sweden.

22 E-mail: gmachmr@gmail.com

23 Phone: +55 49991164271 / +49 17635956337

24

25 **Abstract**

26 Litter decomposition is an important factor affecting local and global C cycles. It is known that  
27 decomposition through soil microbial activity in ecosystems is mainly influenced by soil type and  
28 climatic conditions. However, for agroecosystems, there remains a need for a better understanding  
29 how management practices influence litter decomposition. This study examined the effect of  
30 different management practices on decomposition at 29 sites with long-term (mean duration of 38  
31 years) field experiments (LTEs) using the Tea Bag Index (TBI) protocol with standard litter  
32 (Rooibos and Green tea) developed by Keuskamp et al. (2013). The objective was to determine if  
33 the TBI decomposition rate ( $k$ ) and stabilization factor ( $S$ ) are sensitive enough to detect  
34 differences in litter decomposition between management practices, and how they interact with  
35 edaphic factors, crop type and local climatic conditions. Tea bags were buried and collected after  
36 ~90 days in 16 Austrian and 13 Swedish sites. The treatments at Austrian LTEs focused on mineral  
37 and organic fertilizer application, tillage systems and crop residues management, whereas those in  
38 Sweden addressed cropping systems, mineral fertilizer application and tillage systems. The results  
39 showed that in Austria, incorporation of crop residues and high N fertilizer application increased  
40  $k$ . Minimum tillage had significantly higher  $k$  compared to reduced and conventional tillage. In  
41 Sweden, fertilized plots showed higher  $S$  than non-fertilized plots and high N fertilizer had the  
42 highest  $k$ . Growing spring cereal lead to higher  $k$  than forage crops. Random Forest regressions for  
43 Austria and Sweden jointly showed that  $k$  and  $S$  were mainly governed by climatic conditions,  
44 which explained more than 70% of their variation. However, under similar climatic conditions,  
45 management practices strongly influenced decomposition dynamics. Thus, the TBI approach may

46 be suitable to apply in a more large-scale network on LTEs for evaluating decomposition dynamics  
47 in agroecosystems more precisely.

What I miss in the abstract are implications for the global C cycle (C sink function of the managed soils). At least, the outcome of this research should be linked to the reason for initiating it. In this case the local and global C cycles (most importantly, the C sink capacity as described in the introduction).

## 49 **Introduction**

50 Soil organic carbon (SOC) is one of the most used indicators for soil quality, since its dynamics is  
51 involved in regulating ecosystem functionality through its influences on physical, biological and  
52 chemical soil properties, which are critical for nutrient cycling and soil fertility (Davidson et al.  
53 2006; Janzen 2015). Management practices, such as fertilizer application, use of catch- and cover  
54 crops, organic amendments, length of bare fallow periods, permanent surface protection with  
55 perennial crops, tillage practices and aboveground crop residue management, are impacting SOC  
56 balances for agroecosystems (Kätterer and Bolinder, 2022; Sandén et al., 2018; Paustian et al.,  
57 2016).

58 Agricultural soils play a crucial role in the global carbon (C) cycle due to their C sink capacity  
59 (Paustian et al., 2016; Lal, 2004). In this context, improved management practices that maintain  
60 or increase SOC stocks are considered essential in national greenhouse gas reporting systems  
61 (IPCC, 2006), as well as in other international incentives such as the 4 per mille initiative (Minasny  
62 et al., 2017). The SOC balance is dynamic and determined by the difference between annual C  
63 inputs to soil, and the annual C outputs through the decay of existing soil organic matter and  
64 resulting from microbial activity, which is the main contributor to stable SOC (Tiefenbacher et al.,  
65 2021; Bolinder et al., 2007). Management practices have a great impact on these two factors by  
66 affecting either the amount of C inputs or outputs through decomposition, or both factors  
67 simultaneously.

68 Litter decomposition is a complex biogeochemical process controlled by several biotic and abiotic  
69 factors, where the biological activity of decomposers varies with soil properties and is driven  
70 largely by climatic conditions (Daebeler et al., 2022; Bradford et al., 2016; Cleveland et al., 2014;  
71 Gholz et al., 2000). Decomposition and SOC stabilization are **long processes**, therefore long-term  
72 field experiments (LTEs) are among the most useful resources for quantifying the impact of  
73 management practices on litter decomposition, SOC changes, and soil functioning (Sandén et al.,  
74 2018; Kätterer et al., 2012; Bergkvist and Öborn, 2011). **Experiments determining litter mass loss**  
75 over time *in situ* are also important for understanding SOC dynamics, nutrient cycling and  
76 colonization by soil biota under field conditions. The traditional method that has been used in  
77 ecology for more than 50 years consists of litterbag studies, burying known quantities of various  
78 organic materials into the soil, and retrieving them successively at different intervals (Kampichler  
79 and Bruckner, 2009; Burgess et al., 2002; Bockock and Gilbert, 1957). These studies are not always  
80 comparable because they are subject to variations in e.g., litter type, mesh-size, sample preparation  
81 and analytical methods, and the placement of litterbags may alter the microclimate for  
82 decomposers (Kampichler and Bruckner, 2009).

83 Keuskamp et al. (2013) developed therefore a **low-cost and time-efficient methodology** called Tea  
84 Bag Index (TBI), characterizing the decomposition process with commercially available tea bags,  
85 where green tea is representing labile organic material and rooibos tea as a surrogate for  
86 recalcitrant litter. A decomposition rate ( $k$ ) and a stabilization factor ( $S$ ) are obtained accordingly  
87 with their chemical composition and the respective weight lost at a single point in time after an  
88 incubation period of ca 90-days in the soil. The TBI approach is particularly useful for assessing  
89 geographical differences in decomposition dynamics because results are directly comparable

long-term  
processes

Within  
LTE's,  
experiment  
s  
determinin  
g litter  
mass loss  
are in situ  
are  
important  
for  
understand  
ing....

another  
main  
reason that  
was  
mentioned  
in the  
previous  
para is that  
litterbag  
methodolog  
y is hardly  
standardize  
d.  
Keuskamp  
et al., I  
believe,  
tried to  
develop a  
standardize  
d method  
that is also  
low-cost  
and  
time-efficie  
nt.

90 across sites, varying only with local edaphic and seasonal environmental conditions (Keuskamp et  
91 al., 2013).

92 In several studies, the TBI has been used as an indicator for biological (Sandén et al., 2021;  
93 Costantini et al., 2018) and microbial activity (Daebeler et al., 2022; Treharne et al., 2019; Tóth et  
94 al., 2017), ecosystem functioning, nutrient cycling (Zaller et al., 2016), and soil quality (Tresch et  
95 al., 2018; Buchholz et al., 2017). Generally, this follows the concepts of soil quality as reviewed  
96 by Bünemann et al. (2018), where TBI would primarily be a biological soil quality indicator,

97 although the data apparently were not normalized for the temperature effect. According to the TBI  
98 community, data collected from networks of researchers and citizen scientists for constructing a  
99 global TBI map ([www.teatime4science.org](http://www.teatime4science.org)) shows that most studies have been using the TBI  
100 approach for different forest and grassland ecosystems or urban soils, agricultural fields represent  
101 less than 15% of data. Indeed, there are only a few published studies (Daebeler et al., 2022;

102 Dossou-Yovo et al., 2022; Struijk et al., 2022; Fu et al., 2021; Sandén et al., 2020; Barel et al.,  
103 2019; Poeplau et al., 2018; Sievers and Cook, 2018) that have been using the TBI approach for  
104 evaluating agroecosystems, and it is not clear if this method is sensitive enough to detect  
105 differences between management practices. to investigate

106 This study used the TBI approach for investigating the effect of management practices on the  
107 decomposition rate ( $k$ ) and stabilization factor ( $S$ ) at several LTEs in Austria and Sweden, with  
108 different soil characteristics, and climatic conditions, and subjected to various  
109 management/treatments.

110 To the best of our knowledge, this is the first analysis using the TBI approach for such a large  
111 number of LTEs and different treatments for agroecosystems. The treatments covered management  
112 practices such as organic amendments, crop rotations, aboveground crop residue handling, mineral

reads very specific; is it necessary to state this here in the introduction ?

Do I understand correctly that only 15% of all TBI data collected has been published or used for constructing a global TBI map? Please rephrase this sentence.

113 fertilizer application, and tillage. Our objectives were: (i) to evaluate if the TBI  $k$  and  $S$  parameters  
114 are **sensible** enough to distinguish between different management practices; (ii) to quantify the  
115 effect of management practices on  $k$  and  $S$ ; and (iii) to identify the most important local climate  
116 and/or soil properties affecting litter decomposition in Austria and Sweden.

sensitive;  
but  
sensitive to  
distinguish  
between  
what? litter  
decompositi  
on  
processes?

## 118 **Materials and Methods**

119

### 120 **Study sites**

#### 121 *Austria*

122 We used sixteen Austrian (AT) sites, by selecting contrasting treatments from three different  
123 categories of LTEs where the management practices had been in place for 11 to 63 years (see  
124 details in Table 1). The TBI measurements were made in 2014, 2015 and 2016. Measurements  
125 sometimes took place in more than one year at the same LTE (e.g., MUBIL), and the sites were  
126 abbreviated as AT1 to AT16. Six experiment categories involved carbon balance practices (CB)  
127 focusing on organic matter inputs such as compost and crop residues, eight sites were studying  
128 soil fertility (SF) in terms of differences in mineral N and P fertilization, and two sites examined  
129 tillage systems (TS). The sites are located in several agricultural areas across the country (Fig. 1),  
130 with diverse soil textures (Table S1) and variable crop types (Table 1) and climatic characteristics  
131 (Table 3) during the years of TBI measurements. More details for some of the sites are available  
132 in specific publications: AT3 (Spiegel et al., 2018; Lehtinen et al., 2017; Tatzber et al., 2015;  
133 Aichberger and Söllinger, 2009), AT4 to AT6 (Spiegel et al., 2018; Lehtinen et al., 2014), AT15  
134 and AT16 (Tatzber et al., 2015; Spiegel et al., 2007). In addition, Sandén et al. (2018) puts the  
135 Austrian LTEs in the context of other European LTEs.

136 The purpose of the Austrian C balance LTEs was threefold: i) to assess the sustainability of  
137 stockless vs. livestock-keeping organic farming management on soil and crop traits (AT1, AT2),  
138 ii) to investigate the effects of compost amendments on soil and crops (AT3), and iii) to compare  
139 crop residue incorporation and removal (AT4-AT6). Compost amendment LTE and crop residue  
140 incorporation LTEs also included mineral fertilizer application, whereas AT1 and AT2 only  
141 focused on different organic fertilizer treatments.

142 The eight soil fertility LTEs (AT7-AT14) were all focusing on the effect of mineral fertilizer on  
143 soil and crop properties. In most cases, treatments studied different amounts of mineral nitrogen  
144 fertilizer, whereas AT9 and AT12 also investigated the effect of different amounts of K fertilizer  
145 application. Nitrogen fertilizer was applied in four stages and potassium in three stages, according  
146 to Austrian guidelines for fertilizer (BMLFUW, 2017).

147 For the tillage system experiments, conventional tillage (CT) was compared to reduced tillage (RT)  
148 and minimum tillage (MT). Regular mouldboard ploughing to 25–30 cm soil depth was applied in  
149 CT treatment, whereas cultivator in autumn to a depth of 15–20 cm was used in RT treatment and  
150 a rotary driller that loosened the soil to a depth of 5–8 cm was used in MT treatment. The soil was  
151 turned over only in the CT treatment, where inversion tillage was incorporating the crop residues.  
152 Fertilizer application was crop specific according to the Austrian guidelines for fertilizing  
153 (BMLFUW, 2017).

154

### 155 *Sweden*

156 We used thirteen Swedish (SE) sites by selecting contrasting treatments from three different  
157 categories of LTEs, where the management practices had been in place for 11 to 59 years (see  
158 details in Table 2). TBI measurements at these sites were made only in one year (2016), and were

159 abbreviated as SE1 to SE13. Six sites involving combined management practices (CMP), four  
160 studying the effect of rotations (ROT), and three sites with tillage systems (TS). The sites are  
161 located in several agricultural areas across the country (Fig. 1), with diverse soil textures and  
162 variable crop types (Table 2) and climatic characteristics (Table 3) during the year of TBI  
163 measurements. Bergkvist and Öborn (2011) give a general description of all these LTEs. Only a  
164 brief description of treatments are provided below, more details on the sites with combined  
165 management practices is given by Carlgren and Mattson (2001), and for tillage systems by  
166 Arvidsson et al. (2014), while Poeplau et al. (2015) provide some more insight on the rotation  
167 experiments.

168 The initial purpose of the six LTEs with combined management practices (SE1-SE6) was to  
169 compare a change from the traditional mixed farm production system including crops and livestock  
170 into a pure cash crop system, by studying their effects on the sustainability of crop production and  
171 soil properties (entitled *soil fertility experiments*). The dairy production treatments contain  
172 exclusively perennial grass-clover leys and receive one farmyard manure (FYM) application per  
173 rotation. The cash crop treatments consist of annual crops (i.e., oilseed is replacing leys in the  
174 rotation) without manure applications (0 FYM) only receiving mineral fertilizers application  
175 (NPK). PK applications in all the treatments we selected were aimed at achieving rapid build-up  
176 of the soil PK status, i.e., the amount applied was first replacing that exported in harvested products  
177 (i.e., maintenance principle), to which an extra amount was added (corresponding to the max  
178 treatment). The N-rates in all NPK treatments were also corresponding to max application rate,  
179 and were adapted depending on crop type, where spring cereals, oilseeds, and leys received 125  
180 kg, while sugar beet received 210 kg N ha<sup>-1</sup> yr<sup>-1</sup>. We were also using the control plots receiving no  
181 NPK (0 NPK). As a third factor, aboveground crop residue removal takes place in all FYM



182 treatments, simulating use of harvest residues for fodder or bedding material that are recycled as  
183 manure. The southern sites have 4-year rotations and those in central Sweden have 6-year  
184 rotations. The north site (SE5) is slightly different from the others, consisting of a 7-year rotation  
185 and is studying only the livestock-based production system.

186 For rotation experiments purposes, we were comparing extreme treatments representing two  
187 rotations from four LTEs (SE7-SE10) with the main objective to study changes in SOC (named  
188 *humus balance experiments*), i.e., a continuous spring cereal (SC) system and a ley-dominated  
189 rotations (L). The straw was removed from the plots every year in the SC treatments, and L  
190 consisted of a grass-clover mixture re-established every fourth year. Both rotations were receiving  
191 P and K accordingly with the maintenance principle, and SC and L were receiving 120 and 150 kg  
192 N ha<sup>-1</sup> yr<sup>-1</sup>, respectively.

193 In the three tillage experiments (SE11-SE13), the conventional tillage (CT) and direct seeding  
194 (DS) treatments were the same for all sites, consisting of inversion plowing to a depth of 20-23 cm  
195 and by using a disc seed drill, respectively. The shallow (5-7 cm) and deep (~12 cm) reduced  
196 tillage treatments (SRT and DRT, respectively), consisted of primary tillage operations made in  
197 the autumn and most commonly with a chisel plough. The main crops in all the tillage system  
198 experiments were winter and spring cereals (occasionally oilseed), fertilized accordingly with local  
199 recommendations and with the aboveground residues chopped and left in the field.

200

### 201 **TBI method and sampling design**

202 The TBI method was used according to the protocol established by Keuskamp et al. (2013) to  
203 determine litter decomposition using two types of commercial tetrahedron-shaped tea bags by  
204 Lipton Unilever (Green tea and Rooibos tea). The green tea (*Camellia sinensis*; EAN:

205 8722700055525) has high cellulose content, higher soluble fraction, and lower C:N ratio; while  
206 rooibos tea (*Aspalathus linearis*; EAN: 8722700188438) has high lignin content, lower soluble  
207 fraction, and higher C:N ratio, which is expected to slow down decomposition (Keuskamp et al.,  
208 2013). The synthetic tea bag material has a mesh size opening of 0.25 mm allowing access to  
209 microorganisms, very fine roots and root hairs.

210 The initial mass of the tea bag contents was determined on 20 randomly selected bags for each tea  
211 type from different boxes, oven-dried at 70°C for 48 hours and weighed separately; the mean dry  
212 mass for green tea was  $1.717 \pm 0.048$  g and that for rooibos tea was  $1.835 \pm 0.027$  g. For both  
213 countries, close to seeding of annual crops, from end of April to mid-June depending on location,  
214 each tea bag was properly identified and buried in the soil at 8 cm depth.

215 For Austria, four bags of each tea were used and placed side by side at a distance of 2 to 3 cm.  
216 Each tea bag was properly identified and buried in the soil at 8 cm depth. The TBI incubation  
217 period from placement to last retrieval averaged  $80 \pm 13$  days (Table 3) due to logistic issues for  
218 collection. After collecting, the tea bags were oven-dried at 70°C for 48 hours after removal of  
219 adhered soil particles according to the standardized protocol by Keuskamp et al. (2013). After  
220 drying, the tea bags were opened and the tea content was weighted. The ash content was not  
221 determined.

222 The same TBI protocol was used for the Swedish sites. As in Austria, four bags of each tea were  
223 used per experimental unit, placed side-by-side at a distance of 2 to 3 cm. Each tea bag was  
224 properly identified and buried in the soil at 8 cm depth. The mean TBI incubation period from  
225 placement to last retrieval date averaged  $91 \pm 1$  day (Table 3). In addition to the removal of adhering  
226 soil particles, the ash content was determined (i.e., both for green and rooibos tea on mixed samples  
227 of the four replicates) in a muffle oven at 550°C for 16 hours. The rationale for measuring the ash

228 content was that three of the Swedish sites had a high clay content (Table S1), where the complete  
229 removal of adhering soil particles may be more difficult. However, the ash content was on average  
230 quite low, representing  $15\pm 6\%$  and  $10\pm 4\%$  for the Green and Rooibos tea bags, respectively (data  
231 not shown).

232 After measuring the remaining dry matter, the decomposition rate ( $k$ ) and stabilization factor ( $S$ )  
233 for both countries were calculated according to the TBI presented by Keuskamp et al. (2013). This  
234 standardized method that is using single measurements after an incubation period in the soil of 90-  
235 days have received some criticism. For instance, Mori (2022) and Mori et al. (2023) showed that  
236 this incubation period is not always long enough for the mass loss of green tea to reach a plateau,  
237 and further suggested that time-series mass loss data of rooibos tea is also required to respect the  
238 underlying assumptions of the TBI method. Time-series (15, 30, 60 and 90-days) of green and  
239 rooibos tea were available for all the Swedish sites but only at one Austrian site (16, 26, 62 and  
240 91-days at AT16). The incubation period was consistently always 90-days for the Swedish sites,  
241 and only shorter than that (i.e., about 60-days incubation period) for a few of the Austrian sites  
242 (Table 3). To have as uniform comparisons as possible between the two datasets, we only used the  
243 last measurement for both countries for calculating  $k$  and  $S$ . The purpose of using the time-series  
244 for testing the underlying TBI assumptions was beyond the scope of this paper.

245 The daily climate data for Austria were retrieved from the Central Institution for Meteorology and  
246 Geodynamics (ZAMG). For Sweden, the daily climate data were gathered through official data  
247 from the most nearby LantMet climate stations, and from the Swedish Meteorological and  
248 Hydrological Institute (SMHI). The climate variables used in this study were air temperature,  
249 precipitation, solar radiation, wind speed and air humidity (Table 3).

250 For Austrian soils, pH was measured electrochemically (pH/mV Pocket Meter pH 340i, WTW,  
251 Weilheim, Germany) in 0.01 M CaCl<sub>2</sub> at a soil-to-solution ratio of 1:5 (ÖNORM L1083). Total  
252 soil organic C (TOC) concentrations were analyzed by dry combustion in a LECO RC-612 TruMac  
253 CN (LECO Corp., St. Joseph, MI, United States) at 650°C (ÖNORM L1080). Total N (N<sub>tot</sub>) was  
254 determined according to ÖNORM L1095 with elemental analysis using a CNS (carbon, nitrogen,  
255 sulfur) 2000 SGA-410–06 at 1250°C. Texture was determined according to ÖNORM L1061-1 and  
256 L1062-2. For Sweden the data were gathered from recent archived analysis protocols (pH was  
257 measured in water). Clay content, C content, C:N ratio, and pH measured from each site in both  
258 countries are shown in Table S1 (Supplementary material).

259

## 260 **Data analysis**

261 Analysis of variance (ANOVA) for each experiment category (i.e., CB, SF, TS, CMP and ROT)  
262 was performed to analyze the effects of the treatments and the differences between sites on  $k$  and  
263  $S$  separately for both countries. When the treatments were identical within the same experiment  
264 category, sites were used as a random effect with a mixed ANOVA to test the average treatment  
265 effect, mean values were used as replicates to test the differences between sites. The Tukey's test  
266 ( $p < 0.05$ ) was used for comparing the same treatments and the same sites using R software version  
267 4.2.2. We have treated the data from different years at the same sites in Austria as independent  
268 observations, in the sense they are not a time series of measurement. Interactions between site and  
269 treatment were considered.

270 We calculated a climate-dependent soil biological activity parameter ( $Re_{clim}$ ), by using mean daily  
271 air temperature, total precipitation, and potential evapotranspiration (PET) data in pedotransfer,  
272 soil water balance and biological activity functions. Compared to raw climatic data alone, this  
273 parameter is integrating the effect of climate, soil and crop properties. It is calculated as the product

274 of a soil temperature ( $Re_{temp}$ ) and relative water content ( $Re_{wat}$ ) factor with a daily time step (i.e.,  
275  $Re_{clim} = Re_{temp} \times Re_{wat}$ ), which is thereafter averaged to give an estimate of soil biological activity  
276 for a given time period. These two factors are derived from soil temperature and soil moisture  
277 response functions expressing the activity of decomposers and their relative effect on the decay  
278 rates of organic materials in the arable layer of agricultural soils. Briefly, the  $Re_{temp}$  is calculated  
279 from air temperature and leaf area index using an empirical model (Kätterer and Andrén, 2009),  
280 while  $Re_{wat}$  is calculated using pedotransfer functions for simulating the soil water balance and a  
281 function for estimating PET. In addition to air temperature and leaf area index, calculations of  
282  $Re_{wat}$  also involve the use of daily climatic data for precipitation, wind speed, air humidity, and  
283 solar radiation, as well crop types and yields, soil texture and SOC content. For details see Bolinder  
284 et al., 2008, and Fortin et al., 2011) and information in the following R package used for the  
285 calculations: <https://github.com/ilmenichetti/reclim> (Please refer to the package documentation).  
286 The  $Re_{clim}$  concept can be used for quantifying regional differences in soil biological activity alone  
287 (Bolinder et al., 2013; Andrén et al. 2007) or integrated as a parameter in the ICBM SOC model.  
288 In the latter case, it is adjusting the decomposition rates of both C inputs to soil from crop residues  
289 (e.g., straw) and that of the more stable SOC (Andrén and Kätterer, 1997; Andrén et al., 2004). In  
290 this study, we used the concept of  $Re_{clim}$  and the  $Re_{temp}$  and  $Re_{wat}$  factors to test if the product of  
291 soil-temperature and relative water content better explained the variation in  $k$  and  $S$  than the two  
292 latter alone, and to determine if they also better explained this variation compared to using only  
293 raw climatic data.

294 We calculated simple correlation between variables mean annual temperature (MAT), mean  
295 temperature during the incubation period ( $MAT_{TBI}$ ), total annual precipitation (TAP), total  
296 precipitation during incubation period ( $TP_{TBI}$ ), potential evapotranspiration (PET), potential

297 evapotranspiration during incubation period ( $PET_{TBI}$ ), aridity index (AI), aridity index during  
 298 incubation period ( $AI_{TBI}$ ), temperature and precipitation factor (TxP),  $Re_{clim}$ ,  $Re_{wat}$ ,  $Re_{temp}$ , pH,  
 299 SOC, clay and C:N ratio, using Pearson correlation. For more accurate results, we applied random  
 300 forest (RF) regression in order to rank the importance of variables for  $k$  and  $S$ , using the random  
 301 forest R package (Liaw and Wiener, 2002). The RF is a machine learning technique based on  
 302 decision trees that predicts a certain variable from a set of other variables through a series of binary  
 303 splits of the data, where the variables are either continuous or categorical. For example, in the case  
 304 of a continuous variable it consists of all the data points above or below a certain threshold, for a  
 305 categorical variable it consists of all the data points belonging or not to a specific class. All these  
 306 subsequent splits constitute a decision tree. A random forest is a set of decision trees and it is  
 307 therefore an ensemble technique. This allowed us to utilize treatment and crop variables (including  
 308 N fertilizer) without having to convert them into a ranking. Another useful asset of an RF  
 309 regression is that it evaluates the importance of each variable in defining the predicted variable.  
 310 There are various possible measurements to do that, but they are all based on measuring the  
 311 effectiveness of each subsequent split in each node of a decision tree in sorting out the information.  
 312 In our study, we used a measurement called node purity based on the Gini index, which expresses  
 313 the probability of one split of the data (i.e., one node of the tree) defining the predicted variable.  
 314 The total node purity of a certain variable in a tree is the sum of all the node purity measurements  
 315 for each node considering that particular variable, and the higher it is the more that variable is  
 316 important.

317 We used the following models to predict the two TBI parameters  $k$  and  $S$ :

318

319  $k_n f(TN, SOC, CN, cl, cr, tr, pH, N, PET, PET_{TBI}, TAP, TP_{TBI}, MAT, MAT_{TBI}, AI, AI_{TBI}, Re_{clim}, Re_{wat}, Re_{temp})$

320  $S_n f(TN, SOC, CN, cl, cr, tr, pH, N, PET, PET_{TBI}, TAP, TP_{TBI}, MAT, MAT_{TBI}, AI, AI_{TBI}, Re_{clim}, Re_{wat}, Re_{temp})$

321

322 where soil variables (continuous) were  $TN$  (total N g kg<sup>-1</sup>),  $SOC$  (g kg<sup>-1</sup>),  $CN$  (C:N ratio),  $cl$  (clay  
323 content g 100 g<sup>-1</sup>) and  $pH$ . Categorical variables were  $N$  (N fertilizer application factor with 4  
324 levels),  $cr$  (crop factor, e.g., barley, ley (establishment), ley (production), oat, spring oilseeds,  
325 sugar beet, maize and winter wheat) and  $tr$  (a treatment factor with 30 levels). The climatic  
326 variables ( $PET_{TBI}$ ,  $PET$ ,  $TP_{TBI}$ ,  $TAP$ ,  $MAT_{TBI}$ ,  $MAT$ ,  $AI_{TBI}$  and  $AI$ ) are as defined in Table 3. The  
327 climate response variables  $Re_{clim}$ ,  $Re_{wat}$ ,  $Re_{temp}$  are as described above.

328 Since many of variables in our model are likely to be correlated and carry similar information, we  
329 applied the recursive feature elimination algorithm implemented in the caret R package by Kuhn  
330 et al. (2016), which assess in subsequent iterations the optimal set of predicting variables (features)  
331 to be utilized by the RF model. The procedure starts by fitting a RF model with all variables,  
332 ranking them by importance, and discarding the least important. The algorithm then iterates. The  
333 optimal number and set of features are then defined by a fitness metric (in our case the model R<sup>2</sup>),  
334 selecting the set with the best model fitness. The selected models were used to compute the  
335 variables' relative importance.

336 In order to better understand the similarities between the sites, we run a principal component  
337 analysis (PCA) in the space composed by the variables pH, SOC, TN, C:N, clay, TAP, MAT, PET,  
338 AI and TxP. The analysis was run with the R command prcomp (Venables and Ripley, 2002), from  
339 the base R installation (“Stats” package). Variables were all standardized by rescaling them to zero  
340 mean and unit variance.

341

## 342        **Results**

### 343        *Effect of management practices*

#### 344        *Austria*

345        Both the TBI parameters  $k$  and  $S$  varied between treatments and sites in Austria, and even between  
346        years at the same site within the C balance category (Fig. 2 and Table S2). In general, all treatments

347        in AT1 with a lucerne crop under wetter conditions (2014) **presented** higher  $k$  and lower  $S$  than in  
348        AT2 with a wheat crop under dryer conditions (2015), and the treatment with municipal compost  
349        and green manure (FW) had the highest  $S$  in 2015. The AT3 site did not **present** significant  
350        differences between the treatments. Crop residue incorporation treatment (CRI) had higher  $k$  than  
351        the crop residue removal (CRR) at the AT4 and AT6 sites, and AT6 **presented** a higher  $k$  than at  
352        AT4. Comparing years for the same experiment site and type with different crops, AT5 (2015;  
353        with wheat) had higher  $S$  than AT6 (2016; with maize).

354        For the soil fertility experiment category (Table 1), AT12 had the highest  $k$  and AT13 had the  
355        highest  $S$ . Sites receiving NPK fertilizer application (AT7, AT8 and AT9) had higher  $k$  and  $S$  even  
356        at different N doses than at the AT12, AT13 and AT14 sites receiving only N (i.e., without P and  
357        K). Stabilization was significantly higher in AT9 than in AT7. For potassium trials, AT11  
358        presented significantly higher  $k$  and  $S$  than AT10. Regarding sites receiving only N addition  
359        (AT12, AT13, and AT14), maximum doses (180 kg N) presented the highest  $k$  (0.0095), and no N  
360        addition had the lowest  $k$  (0.0066) (Fig. 2 and Table S2).

361        Regarding the tillage system experiment category (AT15 and AT16 - Table 1),  $k$  was significantly  
362        higher in shallow reduced tillage (SRT) and  $S$  was higher in deep reduced tillage (DRT) in 2015  
363        (AT15), but no significant differences between treatments were found in 2016 (AT16). Site AT16  
364        had significantly higher  $S$  than AT15 (Fig. 2. and Table S2).

presented  
seems a  
strange  
word to  
indicate that  
differences  
between  $k$   
and  $S$ .  
Alternative  
is "show".  
However,  
not being a  
native  
speaker  
myself I am  
not  
absolutely  
sure  
whether it's  
wrong.

Please  
reconsider  
using "  
presented  
or present"



365

366 *Sweden*

367 At the Swedish sites (Table 2), the TBI measurements for the combined management practices  
368 experiment category showed that both  $k$  and  $S$  were significantly higher for the FYM/NPK  
369 treatments maximum amount of farmyard manure and maximum doses of NPK (FYM/NPK) (Fig.  
370 3, Table S3) compared with the control treatments (0 FYM/0 NPK). Comparing sites, SE5 and  
371 SE6 had the highest  $k$  and SE4 had the lowest  $k$ , while SE3 presented the highest  $S$  followed by  
372 SE6, SE5 and SE4, the lowest  $S$  was for SE1 and SE2 (Table S3).

373 Regarding the rotation experiments, the continuous spring cereal rotation presented higher  $k$  than  
374 for ley, but there was no significant difference in  $S$ . Comparing sites, SE9 presented higher  $k$  than  
375 SE7, SE8 and SE10, whereas SE7 and SE8 had the highest  $S$ .

376 For the tillage system experiment category, conventional tillage (CT) had the lowest  $k$  and  $S$ , while  
377 deep reduced tillage (DRT) had the highest  $k$  and  $S$ . The highest  $S$  was observed for the SE12  
378 followed by SE11 and SE13. Sites did not show significant differences for  $k$ .

379 Comparing tillage system experiments in Austria and Sweden (2016) for sites (AT16, SE11, SE12  
380 and SE13) for the treatments that were the same in both countries (CT, SRT and DRT), deep  
381 reduced tillage had the highest  $k$  and shallow reduced tillage had the highest  $S$ . The Austrian site  
382 presented the lowest  $k$  and the highest  $S$  compared to the Swedish sites, which did not present  
383 significant differences among them (Table S3).

384 The field application of the TBI found a clear discrimination of both  $k$  and  $S$  values between the  
385 two countries. The both mean  $k$  and  $S$  values were higher in Sweden (Table 4, Fig. 4). In general,  
386 the variation in  $k$  and  $S$  values were lower in Austria. Indeed, mean  $k$  by site in Austria varied  
387 between 0.0058 and 0.0128 and mean  $S$  varied between 0.113 and 0.442 (Table S2). Whereas mean

388  $k$  by site in Sweden was between 0.0084 and 0.0301, and mean  $S$  was between 0.118 and 0.361  
389 (Table S3). All values for  $k$  and  $S$  were within the range of the previous global TBI investigation  
390 (0.005-0.04 for  $k$ ; and 0.05-0.55 for  $S$ ) by Sandén et al. (2020).

391

### 392 *Influence of climate and soil properties*

393 Using the combined dataset for Austria and Sweden, resulted in significant negative correlation  
394 between  $k$  and MAT, TAP, PET, TxP factor,  $Re_{clim}$  and  $Re_{temp}$ , and significant positive correlation  
395 with the C:N ratio (Table S4). Stabilization factors in Austria and Sweden combined correlated  
396 negatively with MAT<sub>TBI</sub> period,  $Re_{clim}$  and  $Re_{temp}$ .

397 The variable selection procedure with the random forest models (Fig. 5) identified fewer variables  
398 explaining  $k$  and  $S$  values for the combined dataset. The variables explaining  $k$  is low, but the  
399 overall predicting power of the model decreased substantially.

400 According to the optimized random forest model, most of the variance in  $k$  was accounted for by  
401 climatic variables (Fig. 5), with  $Re_{temp}$  ranking the highest, followed by AI and MAT. It was also  
402 showing that treatment, C:N ratio and SOC were important factors as well. The  $S$  was also  
403 influenced by climate-related variables, with  $Re_{temp}$  leading the ranking, and it was followed by pH  
404 and more agronomic variables such as treatment, crop and N fertilizer application.

405 The principal component analysis (Fig. 6) revealed that the data are well divided in two groups,  
406 representing the two countries, which allow us to say that indeed edapho-climatic characteristics  
407 are different between Austria and Sweden. PC1 showed that points in Austria are positively related  
408 to climatic characteristics, such as MAT, TAP and PET. On the other hand, points in Sweden are  
409 positively influenced by high clay content and high C:N ratio. High C:N enhancement is related  
410 to low TAP and TxP. High clay contents are related to low MAT and PET, which can be due to an

411 historical influence on soil weathering. PC2 is dominated by SOC and TN contents, mainly at two  
412 points in Austria (AT7 and AT9: two sites testing soil fertility with NPK and relatively low TAP  
413 and  $TP_{TBI}$  compared to other sites). Austria presented more divergent data, having more  
414 heterogeneous sites than in Sweden.

415

416

417 **Discussion**

418 *Influence of climate and soil properties*

419 In previous studies using the TBI approach, it was shown that climate played a significant role on  
420 decomposition in a temperate biome (Djukic et al., 2018), but when comparing several different  
421 biomes, climatic conditions were of relatively low importance (Fanin et al., 2020). In Boreal soils,  
422 Althuizen et al. (2018) found that increased temperatures enhanced  $k$ , whereas increased  
423 precipitation decreased  $k$  across years. Many studies **have showed** a positive correlation between **have shown**  
424 precipitation and decomposition rates (Pimentel et al., 2019; García Palacios et al., 2016), however  
425 precipitation did not show correlation with  $k$  according to the random forest analysis. On the other  
426 hand,  $Re_{wat}$  showed great importance (Fig. 5). It is because this variable includes nonlinearities due  
427 to its shape according to which decomposition increases with soil moisture and then decreases at  
428 high soil water content due to oxygen limitation of microorganisms (Moyano et al., 2013).

429 In general, higher  $k$  values were observed when the aridity index was lower, and it was identified  
430 by the random forest regression model being an important variable affecting the rate of  
431 decomposition (Fig. 5). This may be related to the observations that in more arid and warmer sites,  
432 the biological processes driving SOC dynamics are impaired which may result in decreasing soil  
433 C and N stocks (Kerr and Ochsner, 2020; Ontl and Schulte, 2012; Jiao et al., 2016; Reynolds et  
434 al., 2007).

435 For practical reasons the teabags in our study were buried in the soil during the growing season,  
436 corresponding to a period when the soil biological activity is highest (Bolinder et al., 2013). When  
437 burying the teabags during the growing season, the difference in climatic variables between sites  
438 are attenuated, in particular with respect to air temperature. For example, the MAT at the Swedish  
439 most northerly (SE5 and SE9) and southerly (SE2) sites are 4.1 and 9.0 °C, respectively, whereas

440 the corresponding mean air temperatures during the incubation period ( $\text{MAT}_{\text{TBI}}$ ) were 14.3 and  
441 16.2 °C, respectively.

442 The TBI  $S$  parameter was also dependent on climate. Indeed, the random forest model identified  
443 climatic parameters as the main factors affecting  $S$  in both Austria and Sweden during all evaluated  
444 periods. In particular,  $Re_{\text{clim}}$  and  $Re_{\text{temp}}$  often showed significant negative correlations, which  
445 implies a negative impact of air temperature on  $S$ . However, raw climatic variables, such as  
446 precipitation and temperature were only weakly correlated with  $S$ . This is probably due to  
447 nonlinear processes, which are considered in the ICBM climate-dependent soil biological activity  
448 calculations such as  $Re_{\text{wat}}$  (as discussed above). Furthermore, since litter decomposition dynamics  
449 is influenced by multiple factors that interact and change over time (Bradford et al., 2016), the  
450 relationships are not always linear. Random forest models that we fitted to the data are more  
451 efficient capturing such combinations and interactions of factors, and can detect relationships that  
452 would not be detectable by linear approaches.

453

#### 454 *Effect of management practices*

455 Our results revealed that a large number of different management practices significantly affected  
456 both the decomposition rate  $k$  and stabilization factor  $S$  according to the TBI approach used in  
457 several LTEs in Austria and Sweden (Fig. 2, 3 and 5). This is in contrast to the studies by Djukic  
458 et al. (2018) as well as Saint-Laurent and Arsenault-Boucher (2020), who did not find any  
459 significant effect of land use and management practices on early-stage litter decomposition in a  
460 temperate biome.

461 In the C balance trials in Austria, soils receiving green manure + municipal compost had higher  $S$   
462 than soil receiving biogas slurry at the second year (Table S2). This is in agreement with studies

463 indicating that compost can improve SOC stabilization over time (Mekki et al., 2019; Eshetu et  
464 al., 2013; Ceccanti et al., 2007). The higher  $k$  in the crop residues incorporated treatments (AT4  
465 and AT6; Table S2) can be attributed to the fact that incorporation of crop residues into the soil  
466 can increase the decomposition rate by stimulating microbial activity. During the early stages of  
467 decomposition, soluble C is rapidly utilized by soil biota (Werth and Kuzyakov, 2010). The higher  
468  $k$  and lower  $S$  at AT6 compared to AT4 were likely due to the loamy texture, lower potential  
469 evapotranspiration resulting in a lower aridity index at the AT4 site (Table 3 and Table S1),  
470 corroborated by the PCA analysis (Fig. 6).

471 There were no significant differences in  $k$  and  $S$  found among treatments in the soil fertility trials  
472 in Austria with NPK addition. However, there was a trend towards a higher  $S$  at AT9 compared to  
473 AT7, likely related to the higher SOC content in AT9, since the climatic conditions and soil texture  
474 were quite similar for both areas, which suggests that higher SOC content may have increased  $S$ .  
475 Site AT11 had higher  $k$  and  $S$  than AT10. Possible explanations for this trend are that AT10 had  
476 lower clay content, lower precipitation resulting in higher PET (corroborated by the PCA analysis)  
477 and AI, contributing to a lower soil moisture content and thereby lower decomposition and  
478 stabilization.

479 Nitrogen supply may favor microbial activity and thereby litter decomposition (Raiesi, 2004). This  
480 was reflected in the treatments where only N was added, where the high dose of 180 kg N ha<sup>-1</sup>  
481 (AT12, AT13 and AT14) induced a significantly higher  $k$  (Table S2), compared to the treatments  
482 with no N addition, which also had the lowest  $k$ . Furthermore, the significant difference between  
483 sites, in which AT12 had the highest  $k$  could at least partly be explained by a higher SOC and  
484 higher pH at this site (corroborated by the PCA analysis).

485 In the tillage system experiment at Fuchsenbigl in Austria in 2015 (AT15, with maize) and 2016  
486 (AT16; with wheat), the shallow reduced tillage showed significantly higher  $k$  than deep reduced  
487 tillage and conventional tillage, only in 2015, indicating that shallow soil tillage stimulated  
488 decomposition that particular year. This was likely due to climatic conditions, since 2015 was  
489 slightly drier and warmer, furthermore maize straw has lower C:N ratio than wheat straw and tends  
490 to decompose faster. Some studies showed faster decomposition under conventional tillage than  
491 under reduced tillage practices (e.g., Lupwayi et al., 2004). However, Kainiemi et al. (2015) found  
492 a decrease in soil respiration in conventional tillage compared to shallow tillage in temperate  
493 regions, which directly implies a lower decomposition (and lower  $k$ ). These differences between  
494 tillage treatments are attributable to indirect effects on soil moisture and temperature profiles. We  
495 attribute the significantly higher  $S$  in 2016 to the fact that this year was moister and less warm,  
496 compared to 2015, resulting in a lower aridity index during the TBI incubation period ( $AI_{TBI}$ ).

497 In the Swedish combined management practices trials, treatments receiving organic and mineral  
498 fertilizer application had higher  $k$  and  $S$  (FYM/NPK; Table S3), likely due to the increase in  
499 microbial diversity and activity favored by nutrient and C supply (Stark et al., 2007). Sites SE5  
500 and SE6 presented the highest  $k$ : SE5 had low evapotranspiration and aridity index, resulting in  
501 more moisture; SE6 had also high  $S$ , due to high clay content and low PET (corroborated by the  
502 PCA analysis). Site SE3 had high  $S$ , which could be related to a higher C:N ratio, as suggested in  
503 another TBI experiment by Althuizen et al. (2018), a study showing that C:N ratio is positively  
504 correlated to  $S$ . The SE1 and SE2 sites had lower  $S$  than SE3 despite similar climatic conditions,  
505 which probably was related to the type of crops growing in these treatments (i.e., sugar beet in the  
506 SE1 and SE2 and grass/clover ley in SE3), since these two crop types have different effects on soil  
507 temperature and moisture.

508 In the Swedish rotation system trials, spring cereal (SC) had higher  $k$  than ley (Table S3). Site SE9  
509 had higher  $k$  and lower  $S$ , in which the low stabilization may be caused by low clay content, low  
510 pH, and high solar radiation, leading to low SOC (corroborated the PCA analysis). The highest  $S$   
511 were found in sites SE7 and SE8, in which the former presented high clay and SOC content, and  
512 SE8 had high precipitation and low PET.

513 For the tillage system treatments in Sweden, similar to the Austrian sites, **the** conventional tillage  
514 **presented** the lowest  $k$ , and also lowest  $S$ . Even when comparing tillage systems in Sweden and  
515 Austria jointly (Table S3) we **could notice** that conventional tillage also presented the lowest  $k$ ,  
516 while deep reduced tillage the highest.

517 The decomposition rate  $k$  was mostly affected by climatic conditions, which was already expected,  
518 as temperature and aridity or moisture, however agronomic and edaphic factors proved to be of  
519 great relevance for  $k$ , as soil management choice (treatment), soil C:N ratio, SOC, crop type, pH,  
520 clay content, soil nitrogen and others. The stabilization factor  $S$  expresses the degree by which the  
521 labile fraction of the plant material is decomposed. We observed that the influence of pH was the  
522 most important edaphic factor, **and the agronomic factors as the soil management treatment**, crop  
523 type, and N fertilizer application were also identified as good predictors. A study conducted by Fu  
524 et al. (2021) suggested that pH, nutrient availability and soil compaction were the main reasons  
525 contributing to the differences in litter decomposition. The net effect of pH is not clear since it  
526 modifies both SOC decay kinetics and productivity simultaneously (Paradelo et al., 2015), with a  
527 maximum effect at around neutral pH (Liao et al., 2016). Nevertheless, the impact of pH on litter  
528 decomposition using the TBI approach seems clear in our study.

529

530

omit "the".  
reconsider  
using  
presented  
.

we  
noticed ...

awkward  
English.  
..., and the  
agronomic  
factors  
such as soil  
managemen  
t, crop  
type, ...



Here I also miss implications for global C cycling/soils as a C sink. This research is about how management practices may influence decomposition processes, and the reason for its importance is that agricultural soils play a crucial role in the global C cycle. Then I expect some words about what this research means for C cycling.

## 531 **Conclusion**

532 Our results show that both the TBI  $k$  and  $S$  parameters were sensitive to management practices in  
533 agroecosystems in Austria and Sweden. We **were observing** significant differences for some of the we  
534 treatments in all categories of LTEs. Notably, for the effect of crop residue incorporation, organic observed  
535 amendments and N fertilizer application, crop types and tillage systems. In the Austrian LTEs,  
536 application of green manure + municipal compost showed a higher  $S$  compared to the application  
537 of other organic amendments. Incorporation of crop residues and high N fertilizer application also  
538 increased  $k$ . In the Swedish LTEs, it was shown that combined management practices with both  
539 farmyard manure and mineral NPK resulted in higher  $k$  and  $S$  compared to no manure and no NPK  
540 applications, whereas growing spring cereals instead of leys increased  $k$  but did not change  $S$ . For  
541 both countries, tillage systems with deep reduced tillage practices presented higher  $k$ , and shallow  
542 reduced tillage presented higher  $S$ . However, these effects were also site or year dependent within  
543 a given country. Climatic conditions had the most important impact on the decomposition rate  $k$   
544 and the stabilization factor  $S$ , but also pH, treatment, crop types, SOC, C:N ratio and clay content  
545 were good predictors of the TBI parameters. Generally, the correlations with raw climatic variables  
546 such as precipitation and temperature were quite poor. Better relationships were found when  
547 nonlinearities due to interactions between climatic and edaphic conditions were accounted for. Our  
548 results highlights how a wide range of soil management practices affect TBI parameters jointly to  
549 soil and climatic conditions.

550

## 551 **Data availability**

552 Data can be provided by the authors upon request.

553

554 **Author contribution**

555 MRG, MB and TS wrote and prepared the manuscript draft; MB, TK and TS supervised and led  
556 the research; MB, OA, HS, JKF, AS, AS and TS developed the methodology; MRG and LM  
557 analyzed the data. All authors reviewed and edited the manuscript.

558

559 **Competing interests**

560 The contact author has declared that none of the authors has any competing interests.

561

562 **Acknowledgements**

563 Financial support was provided by the Swedish Farmers' Foundation for Agricultural Research,  
564 grant number O-18-23-141. Part of this research has been done in the framework of the EJP SOIL  
565 that has received funding from the European Union's Horizon 2020 research and innovation  
566 programme: Grant agreement No 862695.

567

568 **References**

569

570 Aichberger, K., Söllinger, J.: Use of biocompost in agriculture – results of a long-term field trial.  
571 In: Spiegel, H, Zonno, V, editors. Realising the ETAP in the management of waste from farms,  
572 proceedings of the second AQUAGRIS workshop Vienna, 19th June 2009. Vienna: AGES; p. 6–  
573 8., 2009.

574 Althuizen, I. H. J., Lee, H., Sarneel, J. M., Vandvik, V.: Long-term climate regime modulates the  
575 impact of short-term climate variability on decomposition in Alpine grassland soils. *Ecosystems*,  
576 21, 1580-1592, DOI:10.1007/s10021-018-0241-5, 2018.

577 Andrén, O., Kätterer, T.: ICBM: The introductory carbon balance model for exploration of soil  
578 carbon balances, *Ecol Appl*, 7, 1226-1236, DOI: 10.1890/1051-  
579 0761(1997)007[1226:ITICBM]2.0.CO;2, 1997.

580 Andrén, O., Kätterer, T., Karlsson, T.: ICBM regional model for estimations of dynamics of  
581 agricultural soil carbon pools, *Nutr Cycl Agroecosyst* 70, 231-239, DOI:  
582 10.1023/B:FRES.0000048471.59164.ff, 2004.

583 Andrén, O., Kihara, J., Bationo, A., Vanlauwe, B., Kätterer, T.: Soil climate and decomposer  
584 activity in Sub-Saharan Afrika estimated from standard weather station data: A simple climate  
585 index for soil carbon balance calculations, *Ambio*, 36, 379-386, DOI: 10.1579/0044-  
586 7447(2007)36[379:scadai]2.0.co;2, 2007.

587 Arvidsson, J., Håkansson, I.: Response of different crops to soil compaction—Short-term effects  
588 in Swedish field experiments, *Soil Till Res*, 138, 56-63, DOI: 10.1016/j.still.2013.12.006, 2014.

589 Barel, J. M., Kuyper, T. W., Paul, J., de Boer, W., Cornelissen, J. H. C., De Dein, G. B.: Winter  
590 cover crop legacy effects on litter decomposition act through litter quality and microbial  
591 community changes, *J Appl Ecol*, 56, 132-143, DOI:10.1111/1365-2664.13261, 2019.

592 Bergkvist, G., Öborn, I.: Long-term field experiments in Sweden—what are they designed to  
593 study and what could they be used for, *Aspects of Applied Biology*, 113, 75-85, 2011.

594 BMLFUW: Richtlinien für die sachgerechte Düngung. Bundesministerium für Land- und  
595 Forstwirtschaft, Umwelt und Wasserwirtschaft, 2017.

596 Bockock, K. L., Gilbert, O. J. W.: The disappearance of leaf litter under different woodland  
597 conditions, *Plant Soil*, 9, 179-185, DOI: 10.1007/BF01398924, 1957

598 Bolinder, M. A., Andrén, O., Kätterer, T., Parent, L. E.: Soil organic carbon sequestration potential  
599 for Canadian Agricultural Ecoregions calculated using the Introductory Carbon Balance Model,  
600 *Can J Soil Sci*, 88, 451-460, DOI: 10.4141/CJSS07093, 2008.

601 Bolinder, M. A., Fortin, J. G., Anctil, F., Andrén, O., Kätterer, T., de Jong, R., Parent, L. E.: Spatial  
602 and temporal variability of soil biological activity in the Province of Québec, Canada (45-58 °N,  
603 1960-2009) – calculations based on climate records. *Climatic Change*, 117, 739-755, DOI:  
604 10.1007/s10584-012-0602-6, 2013.

605 Bolinder, M. A., Janzen, H. H., Gregorich, E. G., Angers, D. A., VandenBygaart, A. J.: An  
606 approach for estimating net primary productivity and annual carbon inputs to soil for common  
607 agricultural crops in Canada, *Agr Ecosyst Environ*, 118, 29–42, DOI:  
608 10.1016/j.agee.2006.05.013, 2007.

609 Bradford, M. A., Berg, B., Maynard, D. S., Wieder, W. R., Wood, S. A.: Understanding the  
610 dominant controls on litter decomposition. *J Ecol*, 104, 229–38, DOI: 10.1111/1365-2745.12507,  
611 2016.

612 Buchholz, J., Querner, P., Paredes, D., Bauer, T., Strauss, P., Guernion, M., Scimia, J., et al.: Soil  
613 biota in vineyards are more influenced by plants and soil quality than by tillage intensity or the  
614 surrounding landscape, *Sci Rep*, 7, 17445, DOI: 10.1038/s41598-017-17601-w, 2017.

615 Bünemann, E. K., Bongiorno, G., Bai, Z., Creamer, R., de Deyn, G. B., et al.: Soil quality – A  
616 critical review, *Soil Biol Biochem* 120, 105-125, DOI: 10.1016/j.soilbio.2018.01.030, 2018.

617 Burgess, M. S., Mehuys, G. R., Madramootoo, C. A.: Decomposition of grain-corn residues (*Zea*  
618 *mays* L.): A litterbag study under three tillage systems. *Can J Soil Sci*, 82, 127-38. DOI:  
619 10.4141/S01-013, 2002.

620 Carlgren, K., Mattsson, L.: Swedish soil fertility experiments, *Acta Agric Scandin* 51, 49-76.  
621 DOI: 10.1080/090647101753483787, 2001.

622 Ceccanti, B., Masciandaro, G., Macci, C.: Pyrolysis-gas chromatography to evaluate the organic  
623 matter quality of a mulched soil, *Soil Till Res*, 97, 71-8, DOI: 10.1016/j.still.2007.08.011, 2007.

624 Cleveland, C. C., Reed, S. C., Keller, A. B., Nemergut, D.R., O'Neill, S. P., Ostertag, R.,  
625 Vitousek, P.M.: Litter quality versus soil microbial community controls over decomposition: a  
626 quantitative analysis, *Oecologia* 174, 283-294, DOI: 10.1007/s00442-013-2758-9, 2014.

627 Costantini, E. A. C., Castaldini, M., Diago, M. P.: Effects of soil erosion on agroecosystem  
628 services and soil functions: A multidisciplinary study in nineteen organically farmed European  
629 and Turkish vineyards, *J Environ Manag*, 223, 614-624, DOI: 10.1016/j.envman.2018.06.065,  
630 2018.

631 Daebeler, A., Petrová, E., Kinz, E., Grausenburger, S., Berthold, H., Sandén, T., Angel, R.:  
632 Pairing litter decomposition with microbial community structures using the Tea Bag Index  
633 (TBI), *Soil*, 8, 163-76, DOI: 10.5194/soil-8-163-2022, 2022.

634 Davidson, E. A., Janssens, I. A., Luo, Y.: On the variability of respiration in terrestrial  
635 ecosystems: moving beyond Q<sub>10</sub>, *Glob Change Biol*, 12, 154-64, DOI:10.1111/j.1365-  
636 2486.2005.01065.x, 2006.

637 Djukic, I., Kopfer-Rojas, S., Schmidt, I. K., Larsen, K. S., et al.: Early stage litter decomposition  
638 across biomes, *Sci Total Environ*, 628-629, 1369-1394, DOI: 10.1016/j.scitotenv.2018.01.012,  
639 2018.

640 Dossou-Yovo, W., Parent, S. E., Ziadi, N., Parent, E., Parent, L. E.: Tea Bag Index to assess  
641 carbon decomposition rate in cranberry agroecosystems, *Soil Syst*, 5, 44, DOI:  
642 10.3390/soilsystems5030044, 2022.

643 Eshetu, B., Baum, C., Leinweber, P.: Compost of different stability affects the molecular  
644 composition and mineralization of soil organic matter, *Open J Soil Sci*, 3, 58-69. DOI:  
645 10.4236/ojss.2013.31007, 2013.

646 Fanin, N., Bezaud, S., Sarneel, J. M., Cecchini, S., Nicolas, M., Augusto, L.: Relative importance  
647 of climate, soil and plant functional traits during the early decomposition stage of standardized  
648 litter, *Ecosystems*, 23, 1004-1018, DOI: 10.1007/s10021-019-00452-z, 2020.

649 Fortin, J. G., Bolinder, M. A., Anctil, F., Kätterer, T., Andrén, O., Parent, L. E.: Effects of  
650 climatic data low-pass filtering on the ICBM temperature- and moisture-based soil biological  
651 activity factors in a cool and humid temperate climate, *Ecol Model*, 222, 3050-3060. DOI:  
652 10.1016/j.ecolmodel.2011.06.011, 2011.

653 Fu, Y., Jonge, L. W., Greve, M. H., Arthur, E., Moldrup, P., Norgaard, T., Paradelo, M.: Linking  
654 litter decomposition to soil physicochemical properties, gas transport, and land use, *Soil physics*  
655 *and hydrology - Soil Sci Soc Am J*, 86, 34-46, DOI: 10.1002/saj2.20356, 2021.

656 García Palacios, P., Shaw, E. A., Wall, D. H., Hättenschwiler, S.: Temporal dynamics of biotic  
657 and abiotic drivers of litter decomposition, *Ecol Lett*, 19, 554–563, DOI: 10.1111/ele.12590,  
658 2016.

659 Gholz, H. L., Wedin, D. A., Smitherman, S. M., Harmon, M. E., Parton, W. J.: Long-term  
660 dynamics of pine and hardwood litter in contrasting environments: toward a global model of  
661 decomposition, *Glob Change Biol*, 6, 751–765, DOI: 10.1046/j.1365-2486.2000.00349.x, 2000.

662 IPCC. Agriculture, forestry and other land use. IPCC guidelines for national greenhouse gas  
663 inventories. In: Eggleston, S., Buendia, L., Miwa, K., Ngara, T., Tanebe, K. Institute for Global  
664 Environmental Strategies, prepared by the National Greenhouse Gas Inventories Programme,  
665 Hayama, Kanagawa, Japan, 2006.

666 Janzen, H. H.: Beyond carbon sequestration: soil as conduit of solar energy, *Eur J Soil Sci*, 66,  
667 19-32, DOI: 10.1111/ejss.12194, 2015.

668 Jiao, F., Shi, X. R., Han, F. P., Yuan Z. Y.: Increasing aridity, temperature and soil pH induce soil  
669 C-N-P imbalance in grasslands, *Sci Rep*, 6, 19601, DOI:10.1038/srep19601, 2016.

670 Kainiemi, V., Arvidsson, J., Kätterer, T.: Effects of autumn tillage and residue management on  
671 soil respiration in a long-term field experiment in Sweden, *J. Plant Nutr. Soil Sci.*, 178, 189-198,  
672 DOI: 10.1002/jpln.201400080, 2015.

673 Kampichler, C., Bruckner, A.: The role of microarthropods in terrestrial decomposition: a meta-  
674 analysis of 40 years of litterbag studies, *Biol Rev*, 84, 375-89, DOI: 10.1111/j.1469-  
675 185X.2009.00078.x, 2009.

676 Kätterer, T., Andrén, O.: Predicting daily soil temperature profiles in arable soils in cold  
677 temperate regions from air temperature and leaf area index, *Acta Agr Scand*, 59, 77-86. DOI:  
678 10.1080/09064710801920321, 2009.

679 Kätterer, T., Bolinder, M. A.: Chapter 15: Agriculture practices to improve soil carbon  
680 sequestration in upland soil, In: *Understanding and fostering soil carbon sequestration* (ed. Dr  
681 Cornelia Rumpel), DOI: 10.19103/AS.2022.0106.15, 2022.

682 Kätterer, T., Bolinder, M. A., Berglund, K., Kirchmann, H.J.: Strategies for carbon sequestration  
683 in agricultural soils in northern Europe, *Acta Agr Scand*, 62, 181-98. DOI:  
684 10.1080/09064702.2013.779316, 2012.

685 Kerr, D. D., Ochsner, T. E.: Soil organic carbon more strongly related to soil moisture than soil  
686 temperature in temperate grassland, *Soil Sci Soc Am J*, 84, 587-596, DOI: 10.1002/saj2.20018,  
687 2020.

688 Keuskamp, J. A., Dingemans, B. J., Lehtinen, T., Sarneel, J. M., Hefting, M. M.: Tea bag index:  
689 a novel approach to collect uniform decomposition data across ecosystems, *Methods Ecol Evol*,  
690 4, 1070–1075, DOI: 10.1111/2041-210X.12097, 2013.

691 Kuhn, Max. Contributions from Jed Wing, Steve Weston, Andre Williams, Chris Keefer, Allan  
692 Engelhardt, Tony Cooper, Zachary Mayer, Brenton, Kenkel, the R Core Team, Michael Benesty,  
693 Reynald Lescarbeau, Andrew Ziem, Luca Scrucca, Yuan Tang and Can Candan, *Caret*:  
694 Classification and Regression Training. R package version 6.0-71. [https://CRAN.R-](https://CRAN.R-project.org/package=caret)  
695 [project.org/package=caret](https://CRAN.R-project.org/package=caret), 2016.

696 Lal, R.: Soil carbon sequestration impacts on global climate change and food security. *Science*,  
697 304, 1623–1627, DOI: 10.1126/science.1097396, 2004.

698 Lehtinen, T., Dersch, G., Söllinger, J., Baumgarten, A., Schlatter, N., Aichberger, K., Spiegel,  
699 H.: Long-term amendment of four different compost types on a loamy silt Cambisol: impact on  
700 soil organic matter, nutrients and yields, *Arch of Agronomy and Soil Sci*, 63, 663-673, DOI:  
701 10.1080/03650340.2016.1235264, 2017.

702 Lehtinen, T., Schlatter, N., Baumgarten, A., Bechini, L., Krüger, J., Grignani, C., Zavattaro, L.,  
703 Costamagna, C., Spiegel, H.: Effect of crop residue incorporation on soil organic carbon and  
704 greenhouse gas emissions in European agricultural soils, *Soil Use Manage*, 30, 524-538, DOI:  
705 10.1111/sum.12151, 2014.

706 Liao, K., Wu, S., Zhu, Q.: Can Soil pH Be Used to Help Explain Soil Organic Carbon Stocks?,  
707 *Clean Soil Air Water*, 44, 1685–1689, DOI: 10.1002/clen.201600229, 2016.

708 Liaw, A., Wiener, M.: “Classification and Regression by randomForest.” *R News*, 2, 18-22,  
709 [https://CRAN.R-project.org/doc/Rnews/Liaw and Wiener](https://CRAN.R-project.org/doc/Rnews/Liaw%20and%20Wiener), 2002

710 Lupwayi, N. Z., Clayton, G. W., O’Donovan, J. T., Harker, K. N., Turkington, T. K., Rice, W.  
711 A.: Decomposition of crop residues under conventional and zero tillage, *C J Soil Sci*, 84, 403–  
712 410, DOI: 10.4141/S03-082, 2004.

713 Mekki, A., Aloui, F., Sayadi, S.: Influence of biowaste compost amendment on soil organic  
714 carbon storage under arid climate, *Japca J Air Waste Ma*, 69, 867-877, DOI:  
715 10.1080/10962247.2017.1374311, 2019.

716 Minasny, B., Malone, B. P., McBratney, A. B., et al.: Soil carbon 4 per mille, *Geoderma*, 292,  
717 59-86, DOI: 10.1016/j.geoderma.2017.01.002, 2017.

718 Mori T.: Validation of the Tea Bag Index as a standard approach for assessing organic matter  
719 decomposition: A laboratory incubation experiment. *Ecological Indicators*, 141, 109077, DOI:  
720 10.1016/j.ecolind.2022.109077, 2022.

721 Mori, T., Ono, K., Sakai, Y.: Testing the Tea Bag Index as a potential indicator for assessing  
722 litter decomposition in aquatic ecosystems. *Ecological Indicators*, 152, 110358, DOI:  
723 10.1016/j.ecolind.2023.110358, 2023.

- 724 Moyano, F. E., Manzoni, S., Chenu, C.: Responses of soil heterotrophic respiration to moisture  
725 availability: An exploration of processes and models, *Soil Biol. Biochem*, 59, 72–85, DOI:  
726 10.1016/j.soilbio.2013.01.002, 2013.
- 727 Ontl, T. A., Schulte, L. A.: Soil carbon storage, *Nature Education Knowledge*, 3, 2012.
- 728 Paradelo, R., Virto, I., Chenu, C.: Net effect of liming on soil organic carbon stocks: A review.  
729 *Agr Ecosyst Environ*, 202, 98–107, DOI: 10.1016/j.agee.2015.01.005, 2015.
- 730 Paustian, K., Lehmann, J., Ogle, S., et al.: Climate-smart soils, *Nature*, 532, 49-57, DOI:  
731 10.1038/nature17174, 2016.
- 732 Pimentel, L. G., Cherubin, M. R., Oliveira, D. M., Cerri, C. E., Cerri, C. C.: Decomposition of  
733 sugarcane straw: Basis for management decisions for bioenergy production, *Biomass Bioenerg*,  
734 122, 133-44, DOI: 10.1016/j.biombioe.2019.01.027, 2019.
- 735 Poeplau, C., Kätterer, T., Bolinder, M. A., Börjesson, G., Berti, A., Lugato, E.: Low stabilization  
736 of aboveground crop residue carbon in sandy soils of Swedish long-term experiments,  
737 *Geoderma*, 237, 246-255, DOI: 10.1016/j.geoderma.2014.09.010, 2015.
- 738 Poeplau, C., Zopf, D., Greiner, B., et al.: Why does mineral fertilization increase soil carbon  
739 stocks in temperate grasslands?, *Agr Ecosyst Environ*, 265, 144-155, DOI:  
740 10.1016/j.agee.2018.06.003, 2018.
- 741 Raiesi, F.: Soil properties and N application effects on microbial activities in two winter wheat  
742 cropping systems, *Biol Fert Soils*, 40, 88-92, DOI: DOI 10.1007/s00374-004-0741-7, 2004.
- 743 Reynolds, J. F., Smith, D. M. S., Lambin, E. F., et al.: Global desertification: Building a science  
744 for dryland development, *Science*, 316, 847–851, DOI: 10.1126/science.1131634, 2007.
- 745 Saint-Laurent, D., Arsenault-Boucher, L.: Soil properties and rate of organic matter  
746 decomposition in riparian woodlands using the TBI protocol, *Geoderma*, 358, 113976, DOI:  
747 10.1016/j.geoderma.2019.113976, 2020.
- 748 Sandén, T., Spiegel H., Stüger, H. P., Schlatter, N., Haslmayr, H. P., Zavattaro, L., Grignani, C.,  
749 Bechini, L., D'Hose, T., Molendijk, L., Pecio, A., Jarosz, Z., Guzmán, G., Vanderlinden, K.,  
750 Giráldez, J. V., Mallast, J., ten Berge, H.: European long-term field experiments: knowledge  
751 gained about alternative management practices. *Soil Use Manage*, 34, 167-176, DOI:  
752 10.1111/sum.12421, 2018.
- 753 Sandén, T., Spiegel, H., Wenng, H., Schwarz, M., Sarneel, J. M.: Learning science during  
754 teatime: Using a citizen science approach to collect data on litter decomposition in Sweden and  
755 Austria, *Sustainability*, 12, 29-39, DOI:10.3390/su12187745, 2020.
- 756 Sandén, T., Wawra, A., Berthold, H., Miloczki, J., Schweinzer, A., Gschmeidler, B., Spiegel, H.,  
757 Debeljak, M., Trajanov, A.: TeaTime4Schools: Using Data Mining Techniques to Model Litter

758 Decomposition in Austrian Urban School Soils, *Front Ecol Evolut*, 9, 432, DOI:  
759 10.3389/fevo.2021.703794, 2021.

760 Sievers, T., Cook, R. L.: Aboveground and root decomposition of cereal rye and hairy vetch  
761 cover crops, *Soil Sci Soc Am J*, 82, 147-155, DOI: 10.2136/sssaj2017.05.0139, 2018.

762 Spiegel, H., Dersch, G., Hösch, J., Baumgarten, A.: Tillage effects on soil organic carbon and  
763 nutrient availability in a long-term field experiment in Austria, *Die Bodenkultur*, 58, 1-4, 2007.

764 Spiegel, H., Mosleitner, T., Sandén, T., Zaller, J. G.: Effects of two decades of organic and  
765 mineral fertilization of arable crops on earthworms and standardized litter decomposition, *Die*  
766 *Bodenkultur: Journal of Land Management, Food and Environment*, 69, 17-28, DOI:  
767 10.2478/boku-2018-0003, 2018.

768 Stark, C., Condrón, L. M., Stewart, A., Di, H. J., O'Callaghan, M.: Influence of organic and  
769 mineral amendments on microbial soil properties and processes, *Appl Soil Ecol*, 35, 79-93, DOI:  
770 10.1016/j.apsoil.2006.05.001, 2007.

771 Struijk, M., Whitmore, A. P., Mortimer, S., Shu, X., Sizmur, T.: Absence of a home-field  
772 advantage within a short-rotation arable cropping system, *Plant Soil*, 26, 1-7, DOI:  
773 10.1007/s11104-022-05419-z, 2022.

774 Tatzber, M., Schlatter, N., Baumgarten, A., Dersch, G., Körner, R., Lehtinen, T., Unger, G.,  
775 Mifek, E., Spiegel, H.: KMnO<sub>4</sub> determination of active carbon for laboratory routines: three  
776 long-term field experiments in Austria, *Soil Res*, 53, 190-204, DOI: 10.1071/SR14200, 2015.

777 Tiefenbacher, A., Sandén, T., Haslmayr, H-P., Miloczki, J., Wenzel, W., Spiegel, H.: Optimizing  
778 carbon sequestration in croplands: a synthesis, *Agronomy*, 11, 882 DOI:  
779 doi:10.3390/agronomy11050882, 2021.

780 Tóth, Z., Táncsics, A., Kriszt, B., et al.: Extreme effects of drought on decomposition of the soil  
781 bacterial community and decomposition of plant tissue, *Eur J Soil Sci*, 68, 504-513, DOI:  
782 10.1111/ejss.12429, 2017.

783 Treharne, R., Bjerke, J. W., Tømmervik, H., et al.: Arctic browning: Impacts of extreme climatic  
784 events on heathland ecosystem CO<sub>2</sub> fluxes, *Glob Chang Biol*, 25, 489-503, DOI:  
785 10.1111/gcb.14500, 2019.

786 Tresch, S., Moretti, M., Le-Bayon, R. C., Mäder, P., Zanetta, A., Frey, D., et al.: Urban soil  
787 quality assessment – A comprehensive case study dataset of urban garden soils, *Front Environ*  
788 *Sci*, 6, 136, DOI: 10.3389/fenvs.2018.00136, 2018.

789 Venables, W. N., and B. D. Ripley: *Modern Applied Statistics with S*, Springer-Verlag (2002).

790 Werth, M., Kuzyakov, Y.: <sup>13</sup>C Fractionation at the Root-Microorganisms-Soil Interface: A  
791 Review and Outlook for Partitioning Studies, *Soil Biol Biochem*, 42, 1372-1384, DOI:  
792 10.1016/j.soilbio.2010.04.009, 2010.



793 Zaller, J. G., König, N., Tiefenbacher, A., Muraoka, Y., Querner, P., Ratzenböck, A.,  
794 Bonkowski, M., Koller, R.: Pesticide seed dressings can affect the activity of various soil  
795 organisms and reduce decomposition of plant material, *BMC Ecol*, 16, 37, DOI:  
796 10.1186/s12898-016-0092-x, 2016.  
797

798 **Tables**

799

800 Table 1. Experimental sites in Austria. Site acronym, location name, year of TBI measurements,  
 801 category and type of LTE including its duration, main crop cultivated during the TBI  
 802 measurements and management treatments

803

| Site | Location     | Year | Category* | Experiment <sup>†</sup> | Age | Crop    | Treatments <sup>§</sup>                   |
|------|--------------|------|-----------|-------------------------|-----|---------|-------------------------------------------|
| AT1  | MUBIL        | 2014 | CB        | OA                      | 11  | Luzerne | GM, FW, FYM, BS                           |
| AT2  | MUBIL        | 2015 | CB        | OA                      | 12  | Wheat   | GM, FW, FYM, BS                           |
| AT3  | Ritzlhof     | 2015 | CB        | IF-N & OA+N             | 24  | Maize   | 0, 40, 90, 120 N<br>CFW, CGM, CS, CSS+80N |
| AT4  | Rottenhaus   | 2016 | CB        | CR with NPK             | 31  | Maize   | CRR, CRI                                  |
| AT5  | Rutzendorf   | 2015 | CB        | CR with NPK             | 34  | Wheat   | CRR, CRI                                  |
| AT6  | Rutzendorf   | 2016 | CB        | CR with NPK             | 35  | Maize   | CRR, CRI                                  |
| AT7  | Breitstetten | 2015 | SF        | IF-N with PK            | 40  | Wheat   | 60, 90, 120, 145 N                        |
| AT8  | Breitstetten | 2016 | SF        | IF-N with PK            | 41  | Wheat   | 60, 90, 120, 145 N                        |
| AT9  | Haringsee    | 2015 | SF        | IF-N with PK            | 40  | Wheat   | 60, 90, 120, 145 N                        |
| AT10 | Fuchsenbigl  | 2016 | SF        | IF-K with NP            | 61  | Maize   | 0, 150, 300 K                             |
| AT11 | Rottenhaus   | 2016 | SF        | IF-K with NP            | 63  | Maize   | 0, 150, 300 K                             |
| AT12 | Haringsee    | 2016 | SF        | IF-N without PK         | 41  | Maize   | 0, 60, 120, 180 N                         |
| AT13 | Zinsenhof    | 2016 | SF        | IF-N without PK         | 41  | Maize   | 0, 60, 120, 180 N                         |
| AT14 | Zissersdorf  | 2016 | SF        | IF-N without PK         | 41  | Maize   | 0, 60, 120, 180 N                         |
| AT15 | Fuchsenbigl  | 2015 | TS        | TS                      | 27  | Maize   | CT, SRT, DRT                              |
| AT16 | Fuchsenbigl  | 2016 | TS        | TS                      | 28  | Wheat   | CT, SRT, DRT                              |

804 \* CB: carbon balance practices; SF: soil fertility; TS: tillage systems.

805 <sup>†</sup> OA: organic amendments; IF-N & OA+N: N inorganic fertilization and organic amendments plus mineral N; CR &  
 806 IF-P with NK: crop residues and P inorganic fertilization with 90 and 40 kg ha<sup>-1</sup> of N and K, respectively; IF-N with  
 807 PK: N inorganic fertilization with 55 and 180 kg ha<sup>-1</sup> of P and K, respectively; IF-N without PK: N inorganic  
 808 fertilization; IF-K with NP: K inorganic fertilization with 40 and 120 kg ha<sup>-1</sup> of P and K; TS: tillage system.

809 <sup>§</sup> GM: green manure; FW: municipal compost and green manure; FYM: farmyard manure; BS: biogas slurry; CFW:  
 810 compost food waste with 175 kg N ha<sup>-1</sup>; CGM: compost green manure with 175 kg N ha<sup>-1</sup>; CS: compost slurry with  
 811 175 kg N ha<sup>-1</sup>; CSS: compost sewage sludge with 175 kg N ha<sup>-1</sup>; CRR: crop residues removed; CRI: crop residues  
 812 incorporated; CT: conventional tillage; SRT: shallow reduced tillage; DRT: deep reduced tillage.

813

814

815 Table 2. Experimental sites in Sweden. Site acronym, location name, year of TBI measurements  
 816 conducted in 2016, type of LTE including its duration, main crop cultivated during the TBI  
 817 measurements and management treatments

818

| Site | Name          | Experiment* | Age | Crop                | Treatments†      |
|------|---------------|-------------|-----|---------------------|------------------|
| SE1  | Börgeby       | CMP         | 59  | Sugar beet          | FYM/NPK          |
|      |               |             |     | Sugar beet          | 0 FYM/0 NPK      |
| SE2  | Ekebo         | CMP         | 59  | Sugar beet          | FYM/NPK          |
|      |               |             |     | Sugar beet          | 0 FYM/0 NPK      |
| SE3  | Högåsa        | CMP         | 50  | Ley production year | FYM/NPK          |
|      |               |             |     | Ley production year | FYM/0 NPK        |
|      |               |             |     | Spring oilseed      | 0 FYM/NPK        |
|      |               |             |     | Spring oilseed      | 0 FYM/0 NPK      |
| SE4  | Kungsängen    | CMP         | 53  | Oat                 | FYM/NPK          |
|      |               |             |     | Oat                 | 0 FYM/0 NPK      |
| SE5  | Röbacksdalen  | CMP         | 47  | Barley              | FYM/NPK          |
|      |               |             |     | Barley              | FYM/0 NPK        |
| SE6  | Vreta Kloster | CMP         | 50  | Ley production year | FYM/NPK          |
|      |               |             |     | Ley production year | FYM/0 NPK        |
|      |               |             |     | Spring oilseed      | 0 FYM/NPK        |
|      |               |             |     | Spring oilseed      | 0 FYM/0 NPK      |
| SE7  | Lanna         | ROT         | 35  | Oat                 | SC               |
|      |               |             |     | Ley production year | L                |
| SE8  | Lönnstorp     | ROT         | 36  | Barley              | SC               |
|      |               |             |     | Ley establish. year | L                |
| SE9  | Röbacksdalen  | ROT         | 36  | Barley              | SC               |
|      |               |             |     | Ley establish. year | L                |
| SE10 | Säby          | ROT         | 46  | Wheat               | SC               |
|      |               |             |     | Ley establish. year | L                |
| SE11 | Lanna         | TS          | 34  | Winter wheat        | CT, DS           |
| SE12 | Säby          | TS          | 11  | Barley              | CT, SRT, DRT, DS |
| SE13 | Ultuna        | TS          | 19  | Barley              | CT, DRT          |

819

820 \* CMP: combined management practices; ROT: rotation systems; TS: tillage systems.

821 † FYM/NPK: maximum amount of farmyard manure and maximum doses of NPK; 0 FYM/0 NPK: no manure and no  
 822 NPK application; FYM/0 NPK: maximum amount of farmyard manure and no NPK application; 0 FYM/NPK: no  
 823 manure and maximum doses of NPK; SC: spring cereal; L: ley; CT: conventional tillage; DS: direct seeding; SRT:  
 824 shallow reduced tillage; DRT: deep reduced tillage.

825

826

827 Table 3. Annual climatic characteristics for the Austrian and Swedish sites during the entire year  
828 of measurements and only during the TBI period (days) corresponding to the period between the  
829 date of placement and the last retrieval date of the tea bags.  
830

| Site           | TBI period | TAP | TP <sub>TBI</sub> | MAT  | MAT <sub>TBI</sub> | PET   | PET <sub>TBI</sub> | AI   | AI <sub>TBI</sub> |
|----------------|------------|-----|-------------------|------|--------------------|-------|--------------------|------|-------------------|
|                | days       | mm  |                   | °C   |                    | mm    |                    |      |                   |
| <i>Austria</i> |            |     |                   |      |                    |       |                    |      |                   |
| AT1            | 99         | 756 | 294               | 12.5 | 20.3               | 811.4 | 414.0              | 1.07 | 1.4               |
| AT2            | 61         | 516 | 65                | 12.6 | 18.8               | 605.1 | 141.3              | 1.17 | 2.2               |
| AT3            | 80         | 622 | 161               | 12.2 | 20.0               | 682.9 | 295.1              | 1.09 | 1.8               |
| AT4 & 11       | 84         | 939 | 384               | 11.2 | 20.5               | 763.4 | 306.1              | 0.81 | 0.8               |
| AT5            | 63         | 516 | 82                | 12.6 | 19.4               | 605.1 | 148.6              | 1.17 | 1.8               |
| AT6            | 96         | 735 | 226               | 12.0 | 21.6               | 854.2 | 394.0              | 1.16 | 1.7               |
| AT7            | 59         | 516 | 81                | 12.6 | 19.3               | 605.1 | 137.4              | 1.17 | 1.7               |
| AT8            | 84         | 735 | 240               | 12.0 | 17.1               | 854.2 | 334.2              | 1.16 | 1.4               |
| AT9            | 60         | 516 | 81                | 12.6 | 19.2               | 605.1 | 139.6              | 1.17 | 1.7               |
| AT10 & 16      | 92         | 735 | 205               | 12.0 | 21.4               | 851.2 | 378.9              | 1.15 | 1.8               |
| AT12           | 87         | 735 | 203               | 12.0 | 21.8               | 854.2 | 367.4              | 1.16 | 1.8               |
| AT13           | 84         | 939 | 327               | 11.2 | 20.5               | 763.4 | 304.3              | 0.81 | 0.9               |
| AT14           | 82         | 735 | 154               | 12.0 | 21.3               | 854.2 | 319.6              | 1.16 | 2.1               |
| AT15           | 81         | 516 | 103               | 12.6 | 22.5               | 605.1 | 212.9              | 1.17 | 2.1               |
| <i>Sweden</i>  |            |     |                   |      |                    |       |                    |      |                   |
| SE1            | 92         | 436 | 141               | 9.2  | 16.7               | 444.6 | 235.1              | 1.02 | 1.7               |
| SE2            | 91         | 681 | 270               | 9.0  | 16.5               | 578.5 | 297.8              | 0.85 | 1.1               |
| SE3            | 91         | 458 | 142               | 7.9  | 13.3               | 618.0 | 306.4              | 1.35 | 2.1               |
| SE4            | 93         | 429 | 126               | 7.1  | 15.3               | 640.0 | 367.0              | 1.48 | 2.9               |
| SE5 & 9        | 92         | 526 | 164               | 4.1  | 14.3               | 396.2 | 218.2              | 0.75 | 1.3               |
| SE6            | 91         | 433 | 158               | 7.9  | 13.3               | 617.5 | 301.8              | 1.16 | 1.9               |
| SE7 & 11       | 91         | 412 | 115               | 7.4  | 12.7               | 514.2 | 276.4              | 1.3  | 2.4               |
| SE8            | 90         | 610 | 224               | 9.4  | 14.4               | 500.2 | 265.7              | 0.82 | 1.2               |
| SE10 & 12      | 91         | 429 | 126               | 7.1  | 15.3               | 358.5 | 155.7              | 0.84 | 1.2               |
| SE13           | 92         | 429 | 126               | 7.1  | 15.3               | 639.1 | 377.8              | 1.5  | 3.0               |

831  
832 TAP: total annual precipitation; TP<sub>TBI</sub>: total precipitation during TBI period; MAT: mean annual temperature;  
833 MAT<sub>TBI</sub>: mean temperature during TBI period; PET: total annual potential evapotranspiration; PET<sub>TBI</sub>: potential  
834 evapotranspiration during TBI period; AI: annual aridity index (PET divided by TAP); AI<sub>TBI</sub>: aridity index during TBI  
835 period.  
836

837

838 Table 4 – Mean values of decomposition rate ( $k$ ) and stabilization factor ( $S$ ) for the TBI approach  
839 after the incubation period.

840

|                | Mean TBI parameters |                  |
|----------------|---------------------|------------------|
|                | $k$                 | $S$              |
| <i>Sweden</i>  | $0.0160 \pm 0.01$   | $0.247 \pm 0.14$ |
| <i>Austria</i> | $0.0115 \pm 0.004$  | $0.228 \pm 0.11$ |

841

842

843 **Figures**

844

845 **FIGURE 1**

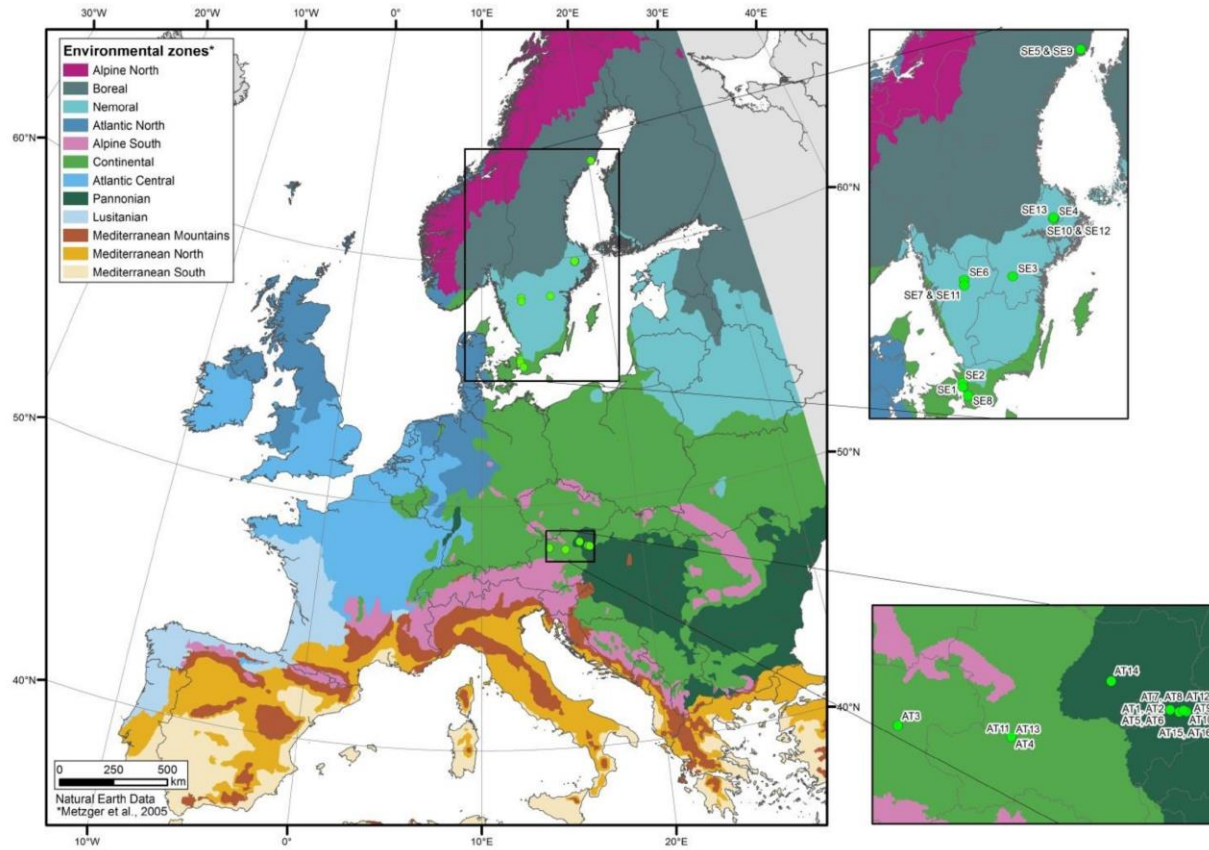

846

847 **FIGURE 2**

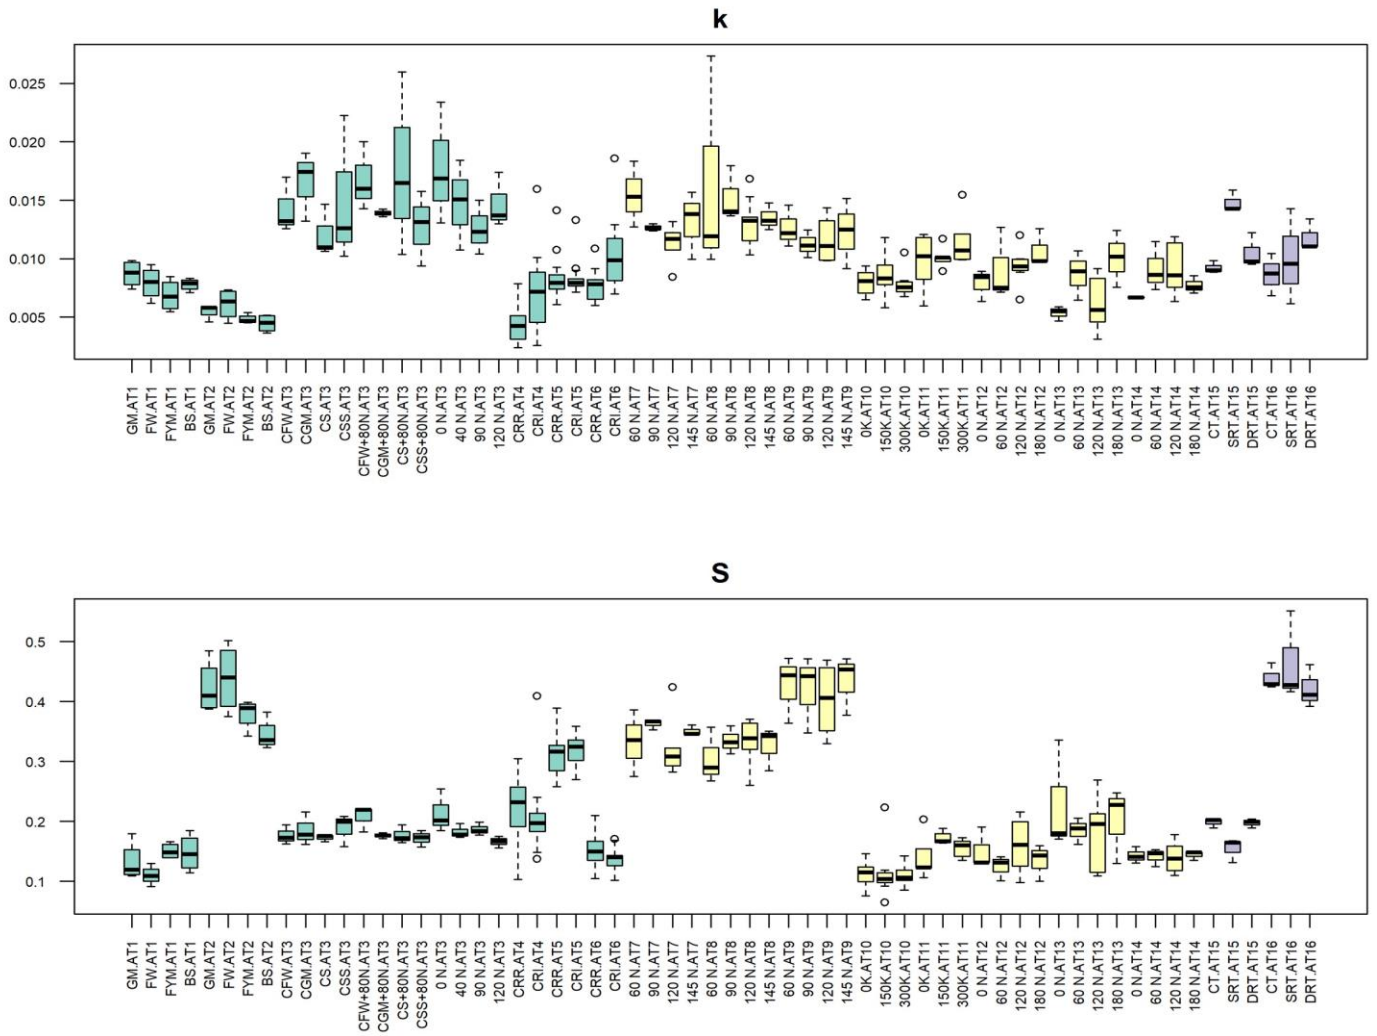

848

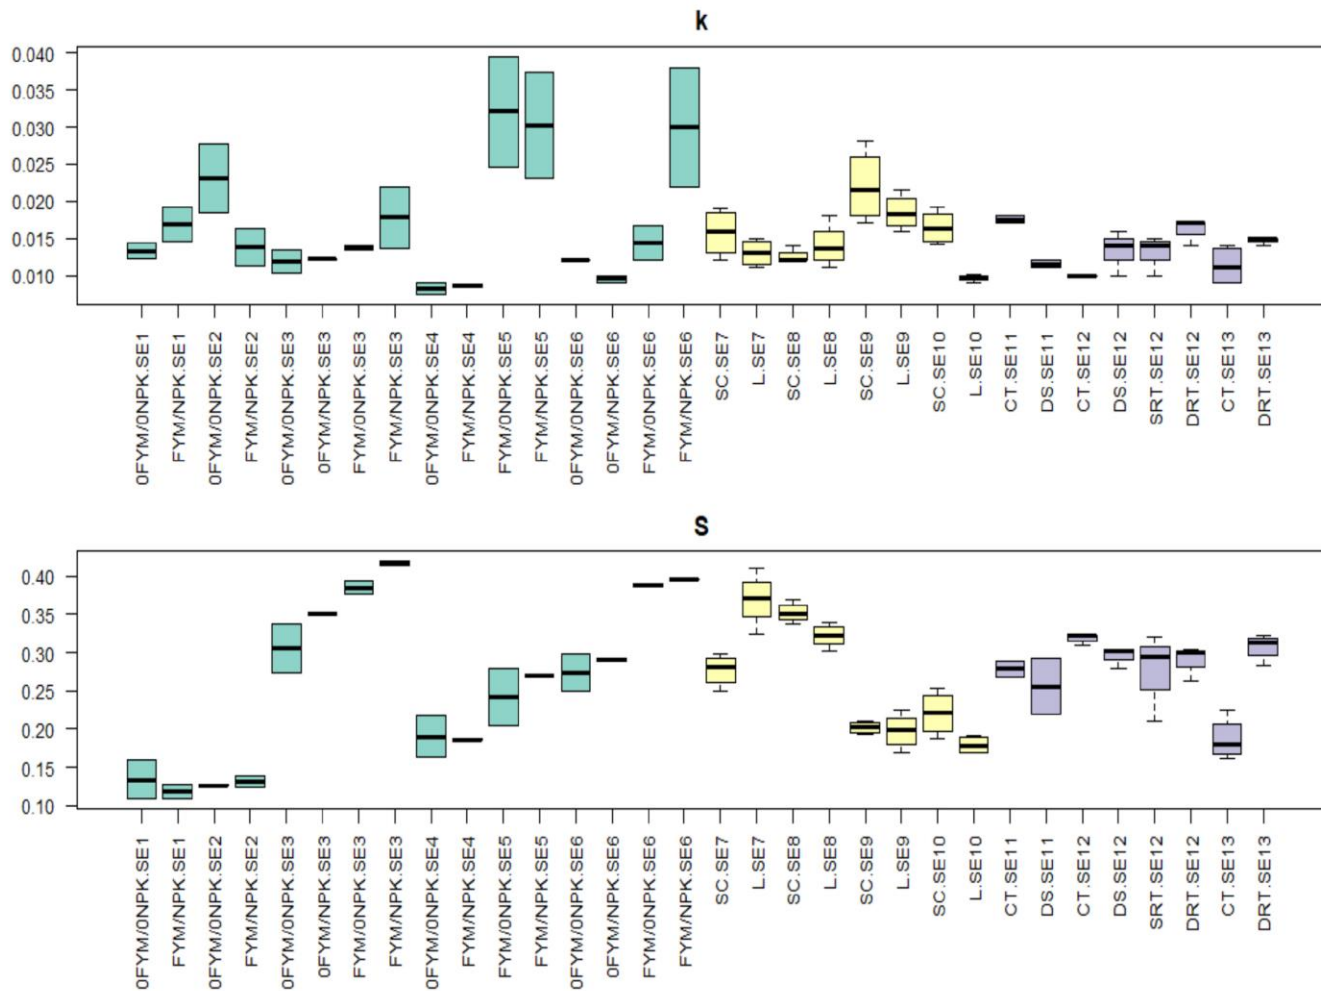



852 **FIGURE 4**

853

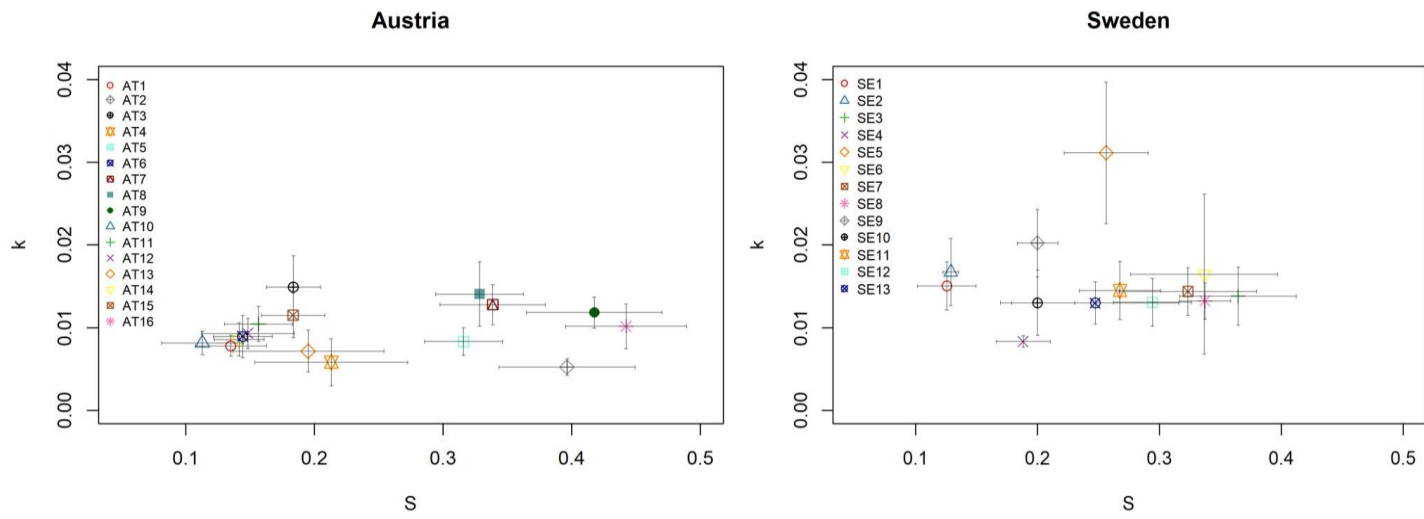

854

855 **FIGURE 5**

856

857

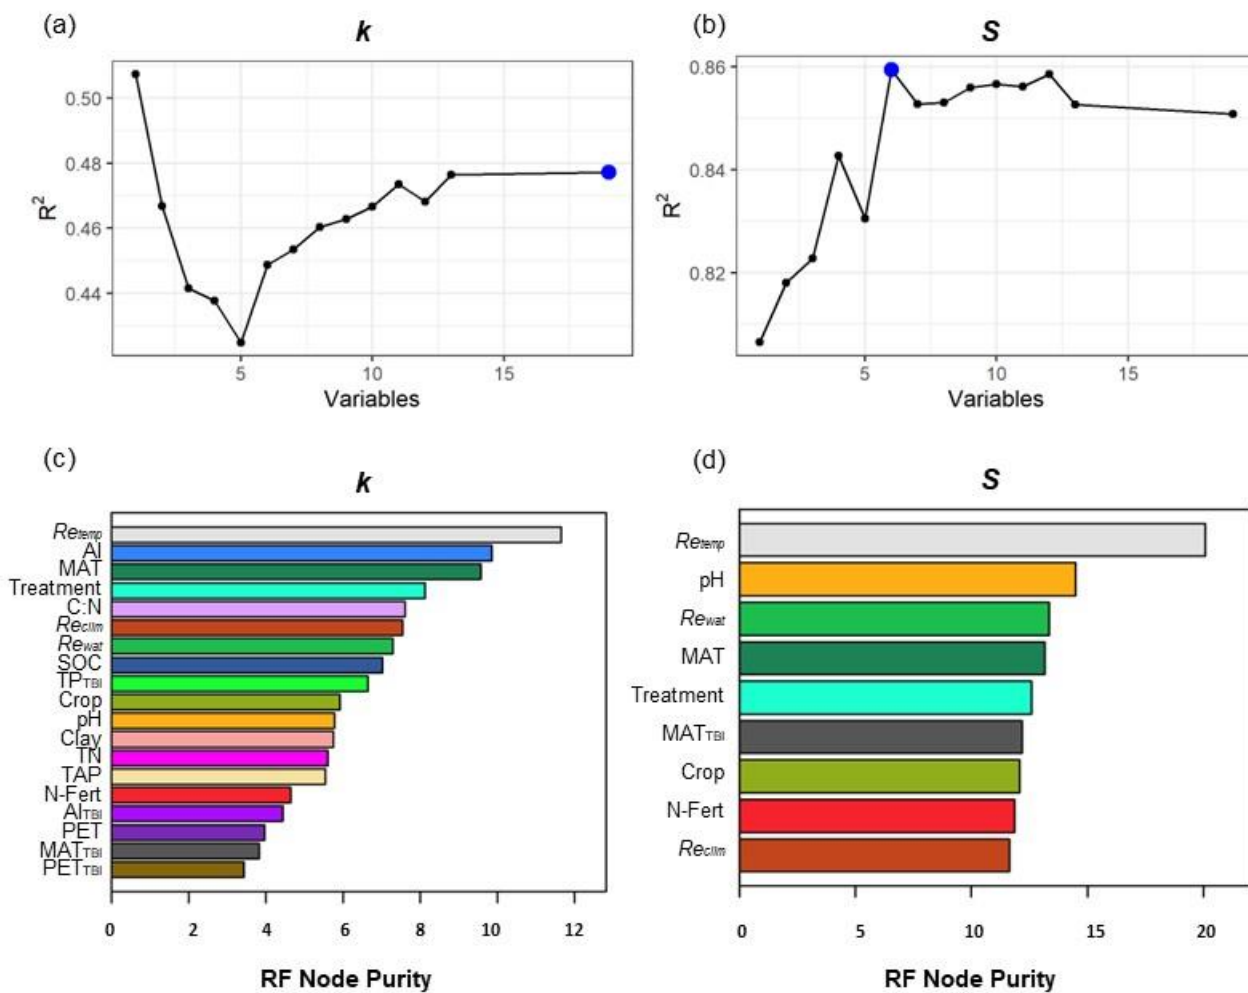

858

859



874

875 Figure 3 - Average decomposition rate ( $k$ ) and stabilization factor ( $S$ ) for each site and treatment  
876 in Sweden. The extents of the box indicate 25<sup>th</sup> and 75<sup>th</sup> percentiles, and the lines represent the 50<sup>th</sup>  
877 percentile. Whiskers represent the 10<sup>th</sup> and 90<sup>th</sup> percentiles. Green boxes: combined management  
878 practices (CMP) experiment; yellow boxes: rotation (ROT) experiment; purple boxes: tillage  
879 systems (TS) experiment.

880

881 Figure 4 - Distribution of the mean decomposition rate constant ( $k$ ) and the stabilization factor ( $S$ )  
882 for each site in Austria and Sweden. Errors bars represent standard deviation.

883

884 Figure 5 - a and b) Variables selection procedure to identify the optimal number of variables to  
885 explain the variance of  $k$  and  $S$  with a Random Forest model. The blue point represents the optimal  
886 model. c and d) Relative importance of the variables used by each optimized Random Forest model  
887 to predict the variance in the  $k$  and  $S$  parameters in Austria and Sweden jointly. The higher the  
888 Node purity, the higher the importance of such variable.

889

890 Figure 6 - Principal component analysis showing how the sites in Austria and Sweden differ based  
891 on the variables. PC1 and PC2 are the first two components, explaining most variance. The  
892 loadings (black arrows) are the weight of each variable in defining each principal component. The  
893 size of the arrows can tell how much they contribute defining this space, while the direction is their  
894 contribution on each axis. Tap: total annual precipitation; TxP: temperature x precipitation factor;  
895 pet: potential evapotranspiration; mat: mean annual temperature; tn: total soil nitrogen; soc: total  
896 soil organic carbon; cn: soil C:N ratio; ai: aridity index.
